# Supplementary material for: Impact of regiochemistry in energetic materials science: a case of (nitratomethyl-1,2,3-triazolyl)furazans
Source: Royal Society of Chemistry journal article supplement (doi:10.1039/d3dt00917c), 2023-01-01

## Supporting Information for

### Impact of regiochemistry in energetic materials science: a case of (nitratomethyl-1,2,3-triazolyl)furazans

Margarita A. Epishina,<sup>1</sup> Alexander S. Kulikov,<sup>1</sup> Ivan V. Ananyev,<sup>2,3</sup> Aleksei A. Anisimov,<sup>3,4</sup>  
Konstantin A. Monogarov,<sup>5</sup> Leonid L. Fershtat\*<sup>1</sup>

<sup>1</sup> N. D. Zelinsky Institute of Organic Chemistry, Russian Academy of Sciences, Leninsky Prosp.  
47, Moscow 119991 (Russian Federation).

<sup>2</sup> N.S. Kurnakov Institute of General and Inorganic Chemistry, Russian Academy of Sciences,  
GSP-1, Leninsky prospect, 31, 119991 Moscow, Russia.

<sup>3</sup> National Research University Higher School of Economics 101000, Myasnitskaya str., 20,  
Moscow (Russian Federation).

<sup>4</sup> Nesmeyanov Institute of Organoelement Compounds, Russian Academy of Sciences, 28  
Vavilova st, Moscow, Russia, 119991

<sup>5</sup> N. N. Semenov Federal Research Centre for Chemical Physics, Russian Academy of Sciences,  
4 Kosygin Str., Moscow 119991 (Russian Federation).

\*E-mail: [fershtat@bk.ru](mailto:fershtat@bk.ru)

## Table of Contents

|                                        |          |
|----------------------------------------|----------|
| <b>S1. Crystallographic data</b> ..... | <b>2</b> |
| <b>S2. Computational details</b> ..... | <b>7</b> |
| <b>S3. Copies of NMR spectra</b> ..... | <b>7</b> |

## S1. Crystallographic data

**Table S1.** Crystallographic details and refinement parameters for **3c** and **4a**.

|                                                                                                     | <b>3c</b>                                                   | <b>4a</b>                                                   |
|-----------------------------------------------------------------------------------------------------|-------------------------------------------------------------|-------------------------------------------------------------|
| Formula                                                                                             | C <sub>6</sub> H <sub>6</sub> N <sub>6</sub> O <sub>5</sub> | C <sub>5</sub> H <sub>3</sub> N <sub>7</sub> O <sub>6</sub> |
| Mass                                                                                                | 242.17                                                      | 257.14                                                      |
| T, K                                                                                                | 100                                                         | 100                                                         |
| Crystal system                                                                                      | Monoclinic                                                  | Monoclinic                                                  |
| Space group                                                                                         | C2/c                                                        | P2 <sub>1</sub> /n                                          |
| Z (Z')                                                                                              | 8 (1)                                                       | 4 (1)                                                       |
| a, Å                                                                                                | 18.5628(3)                                                  | 11.2782(3)                                                  |
| b, Å                                                                                                | 7.92780(10)                                                 | 6.3430(2)                                                   |
| c, Å                                                                                                | 13.6589(2)                                                  | 13.7366(4)                                                  |
| α, °                                                                                                | 90                                                          | 90                                                          |
| β, °                                                                                                | 111.2210(10)                                                | 104.6130(10)                                                |
| γ, °                                                                                                | 90                                                          | 90                                                          |
| V, Å <sup>3</sup>                                                                                   | 1873.77(5)                                                  | 950.90(5)                                                   |
| d <sub>cryst</sub> , g·cm <sup>-3</sup>                                                             | 1.717                                                       | 1.796                                                       |
| F(000)                                                                                              | 992                                                         | 520                                                         |
| 2θ <sub>max</sub> , °                                                                               | 60                                                          | 58                                                          |
| Number of reflections measured                                                                      | 25668                                                       | 11887                                                       |
| Independent reflections                                                                             | 2710                                                        | 2533                                                        |
| Reflections with I>2σ(I)                                                                            | 2598                                                        | 2374                                                        |
| Number of parameters                                                                                | 178                                                         | 175                                                         |
| R <sub>1</sub>                                                                                      | 0.0299                                                      | 0.0306                                                      |
| wR <sub>2</sub>                                                                                     | 0.0777                                                      | 0.0840                                                      |
| GOF                                                                                                 | 1.040                                                       | 1.038                                                       |
| Residual electron density, e <sup>-</sup> ·Å <sup>-3</sup><br>(d <sub>min</sub> /d <sub>max</sub> ) | 0.481/-0.213                                                | 0.392/-0.277                                                |

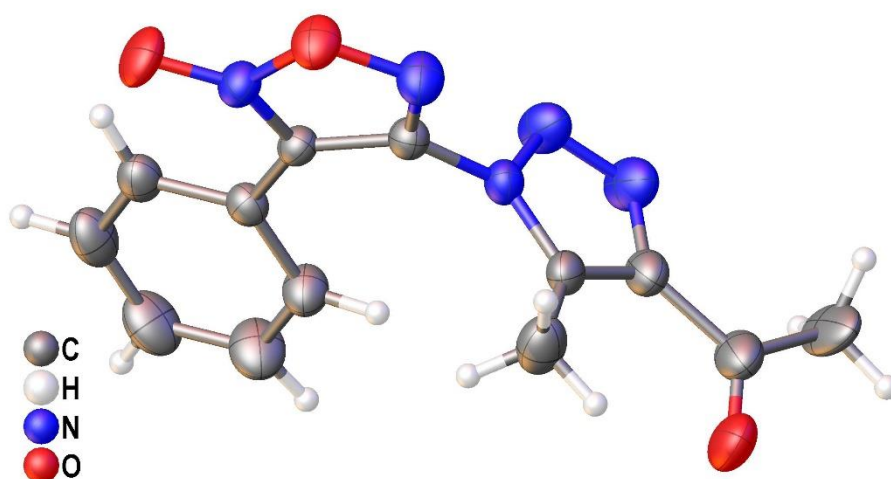

**Figure S1.** A general view of the independent unit of the FAZGOF structure.

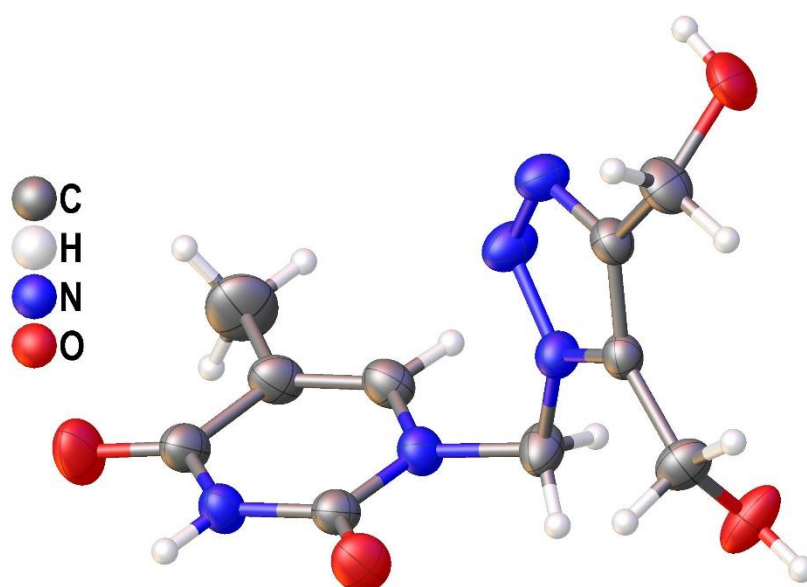

**Figure S2.** A general view of the independent unit of the YASJIM structure.

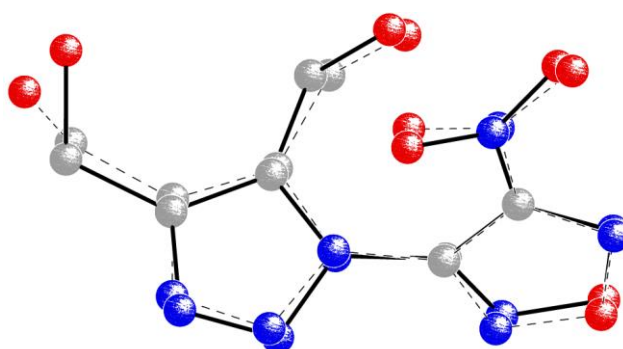

**Figure S3.** The best root-mean-square overlap for the non-hydrogen atoms of the crystal (dashed lines) and the equilibrium isolated (full lines) molecular conformations of **3c**.

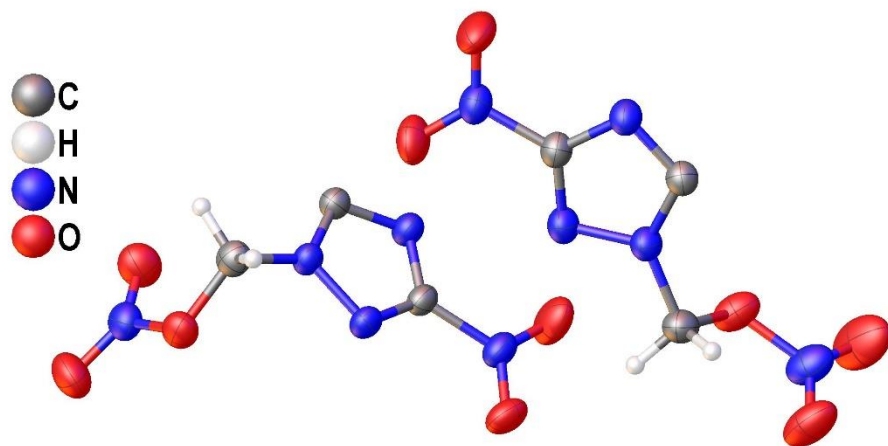

**Figure S4.** A general view of the independent unit of the ELIGUD structure.

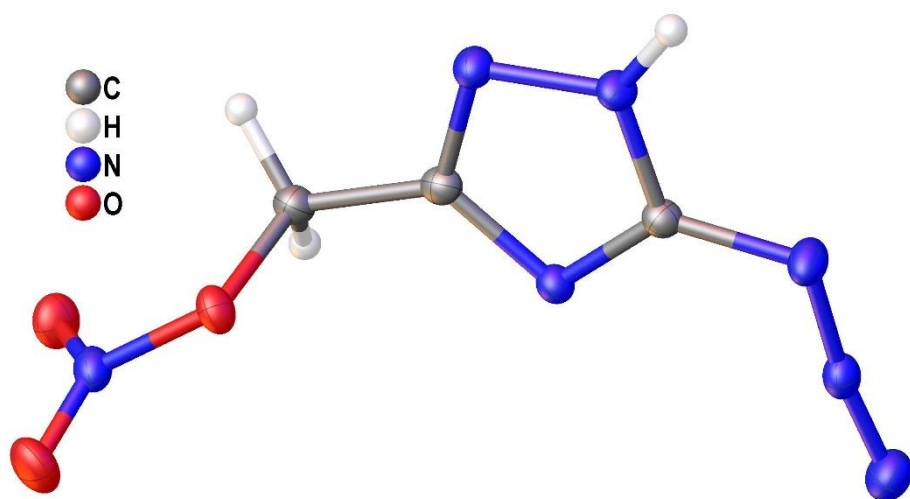

**Figure S5.** A general view of the independent unit of the ZUJCUF structure.

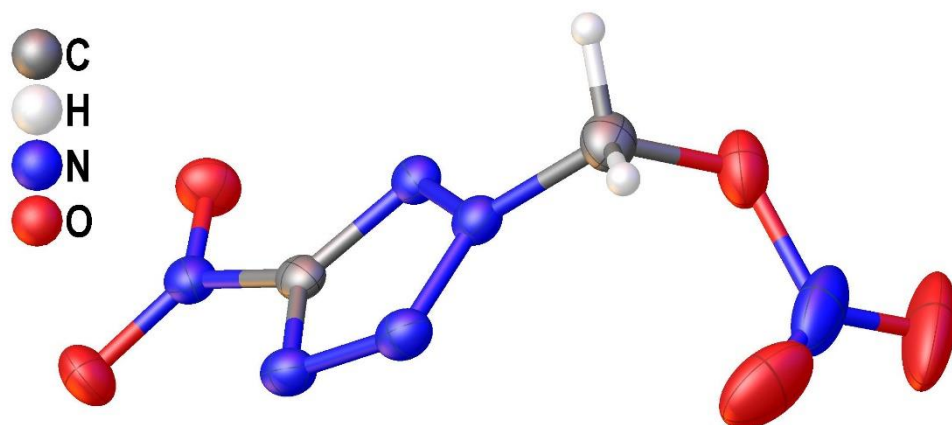

**Figure S6.** A general view of the independent unit of the HEGLEM structure.

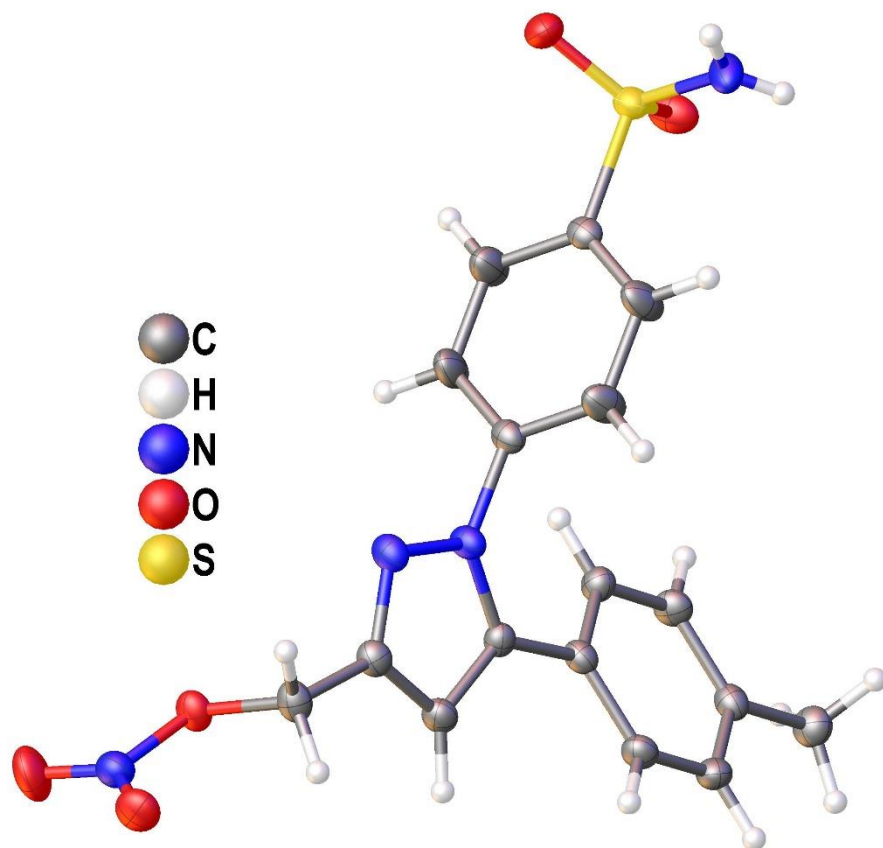

**Figure S7.** A general view of the independent unit of the KOXWIF structure.

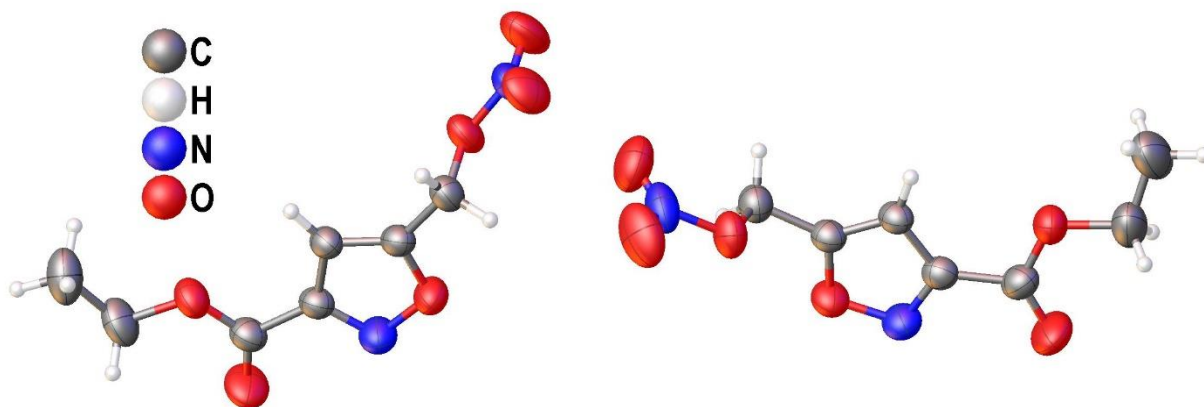

**Figure S8.** A general view of the independent unit of the NILZAM structure.

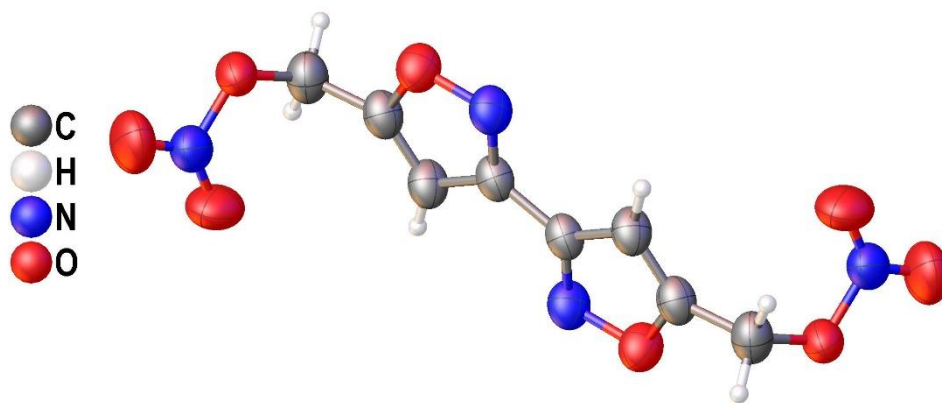

**Figure S9.** A general view of the molecule in the TAXDUU structure.

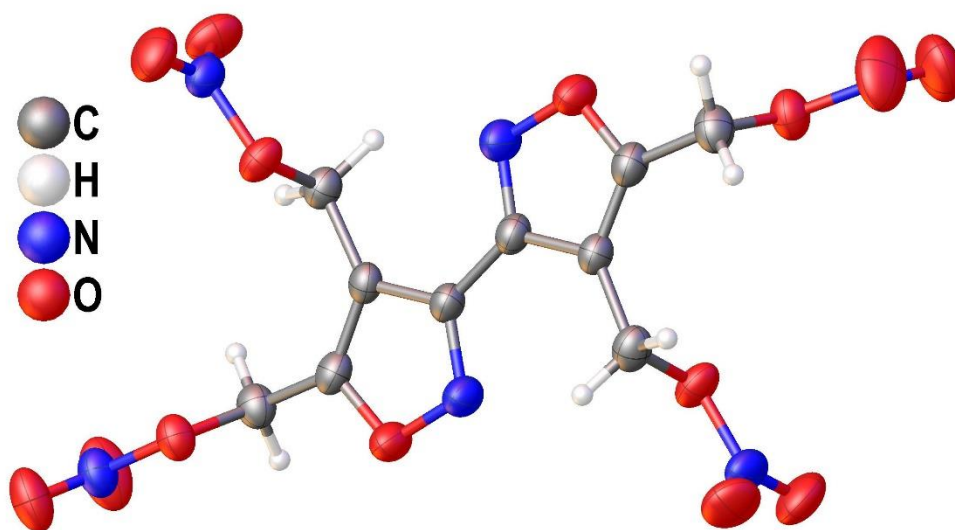

**Figure S10.** A general view of the independent unit of the WANVEP structure.

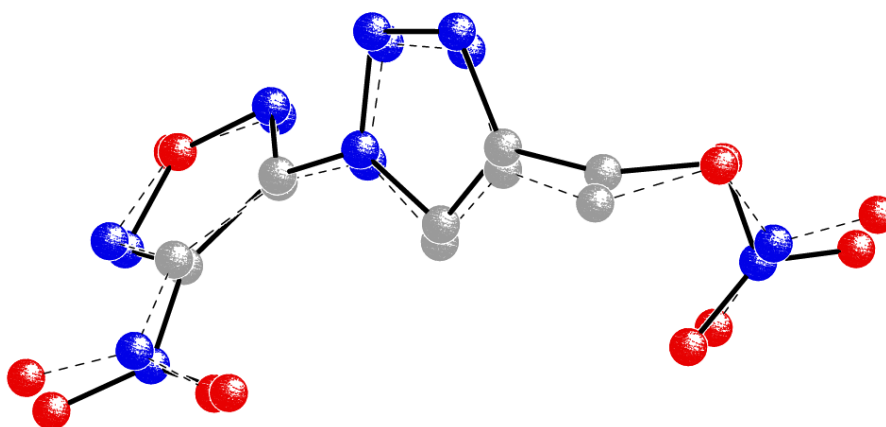

**Figure S11.** The best root-mean-square overlap for the non-hydrogen atoms of the crystal (dashed lines) and the equilibrium isolated (full lines) molecular conformations of **4a**.

## S2. Computational details

A general formula used for the calculation of the enthalpies of formation was as follows:

$$\Delta_f H^0_{(g)} = \Sigma H_{atom} - \Sigma \Delta_{thermal} H_{atom} - \Sigma D_0$$

$$\Sigma D_0 = \Sigma CBS-4M(H_{atom}) - CBS-4M(H_{molecule})$$

Corrections on values of enthalpies of sublimation and enthalpies of vaporization were calculated according to empirical formulae:

$$\Delta_f H^0_{(subl)} = 0.04476 \cdot T_m$$

$$\Delta_f H^0_{(vap)} = 0.02095 \cdot T_{vap}$$

**Table S2.** Atomic contributions to the enthalpies of formation.

|   | multiplicity | $\Delta_f H^0$ (0K),<br>kcal mol <sup>-1</sup> | Thermal $\Delta\Delta H$ ,<br>kcal mol <sup>-1</sup> | CBS-4M,<br>hartree |
|---|--------------|------------------------------------------------|------------------------------------------------------|--------------------|
| H | 2            | 51.63                                          | 1.01                                                 | -0.500991          |
| C | 3            | 169.98                                         | 0.25                                                 | -37.786156         |
| N | 4            | 112.53                                         | 1.04                                                 | -54.522462         |
| O | 3            | 58.99                                          | 1.04                                                 | -74.991202         |

**Table S3.** Calculated enthalpies of formation.

|                                                  | <b>4a</b>    | <b>4b</b>     | <b>4c</b>     |
|--------------------------------------------------|--------------|---------------|---------------|
| CBS-4( $H_{molecule}$ ),<br>hartree              | -1025.297561 | -1025.294723  | -1343.93672   |
| $\Sigma$ CBS-4M( $H_{atom}$ ),<br>hartree        | -1022.038199 | -1022.038199  | -1339.821414  |
| $\Sigma D_0$ , hartree                           | 3.259362     | 3.256524      | 4.115306      |
| $\Delta_f H^0_{(g)}$ , kcal mol <sup>-1</sup>    | 83.4         | 85.2          | 52.0          |
| $\Delta_f H^0_{(cond)}$ , kcal mol <sup>-1</sup> | 67.9 (solid) | 76.0 (liquid) | 42.9 (liquid) |

## S3. Copies of NMR spectra

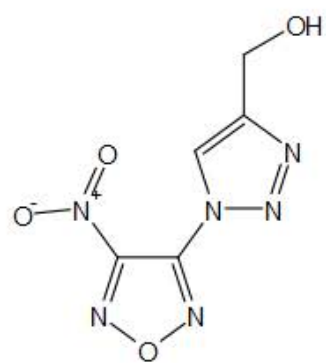

**3a**

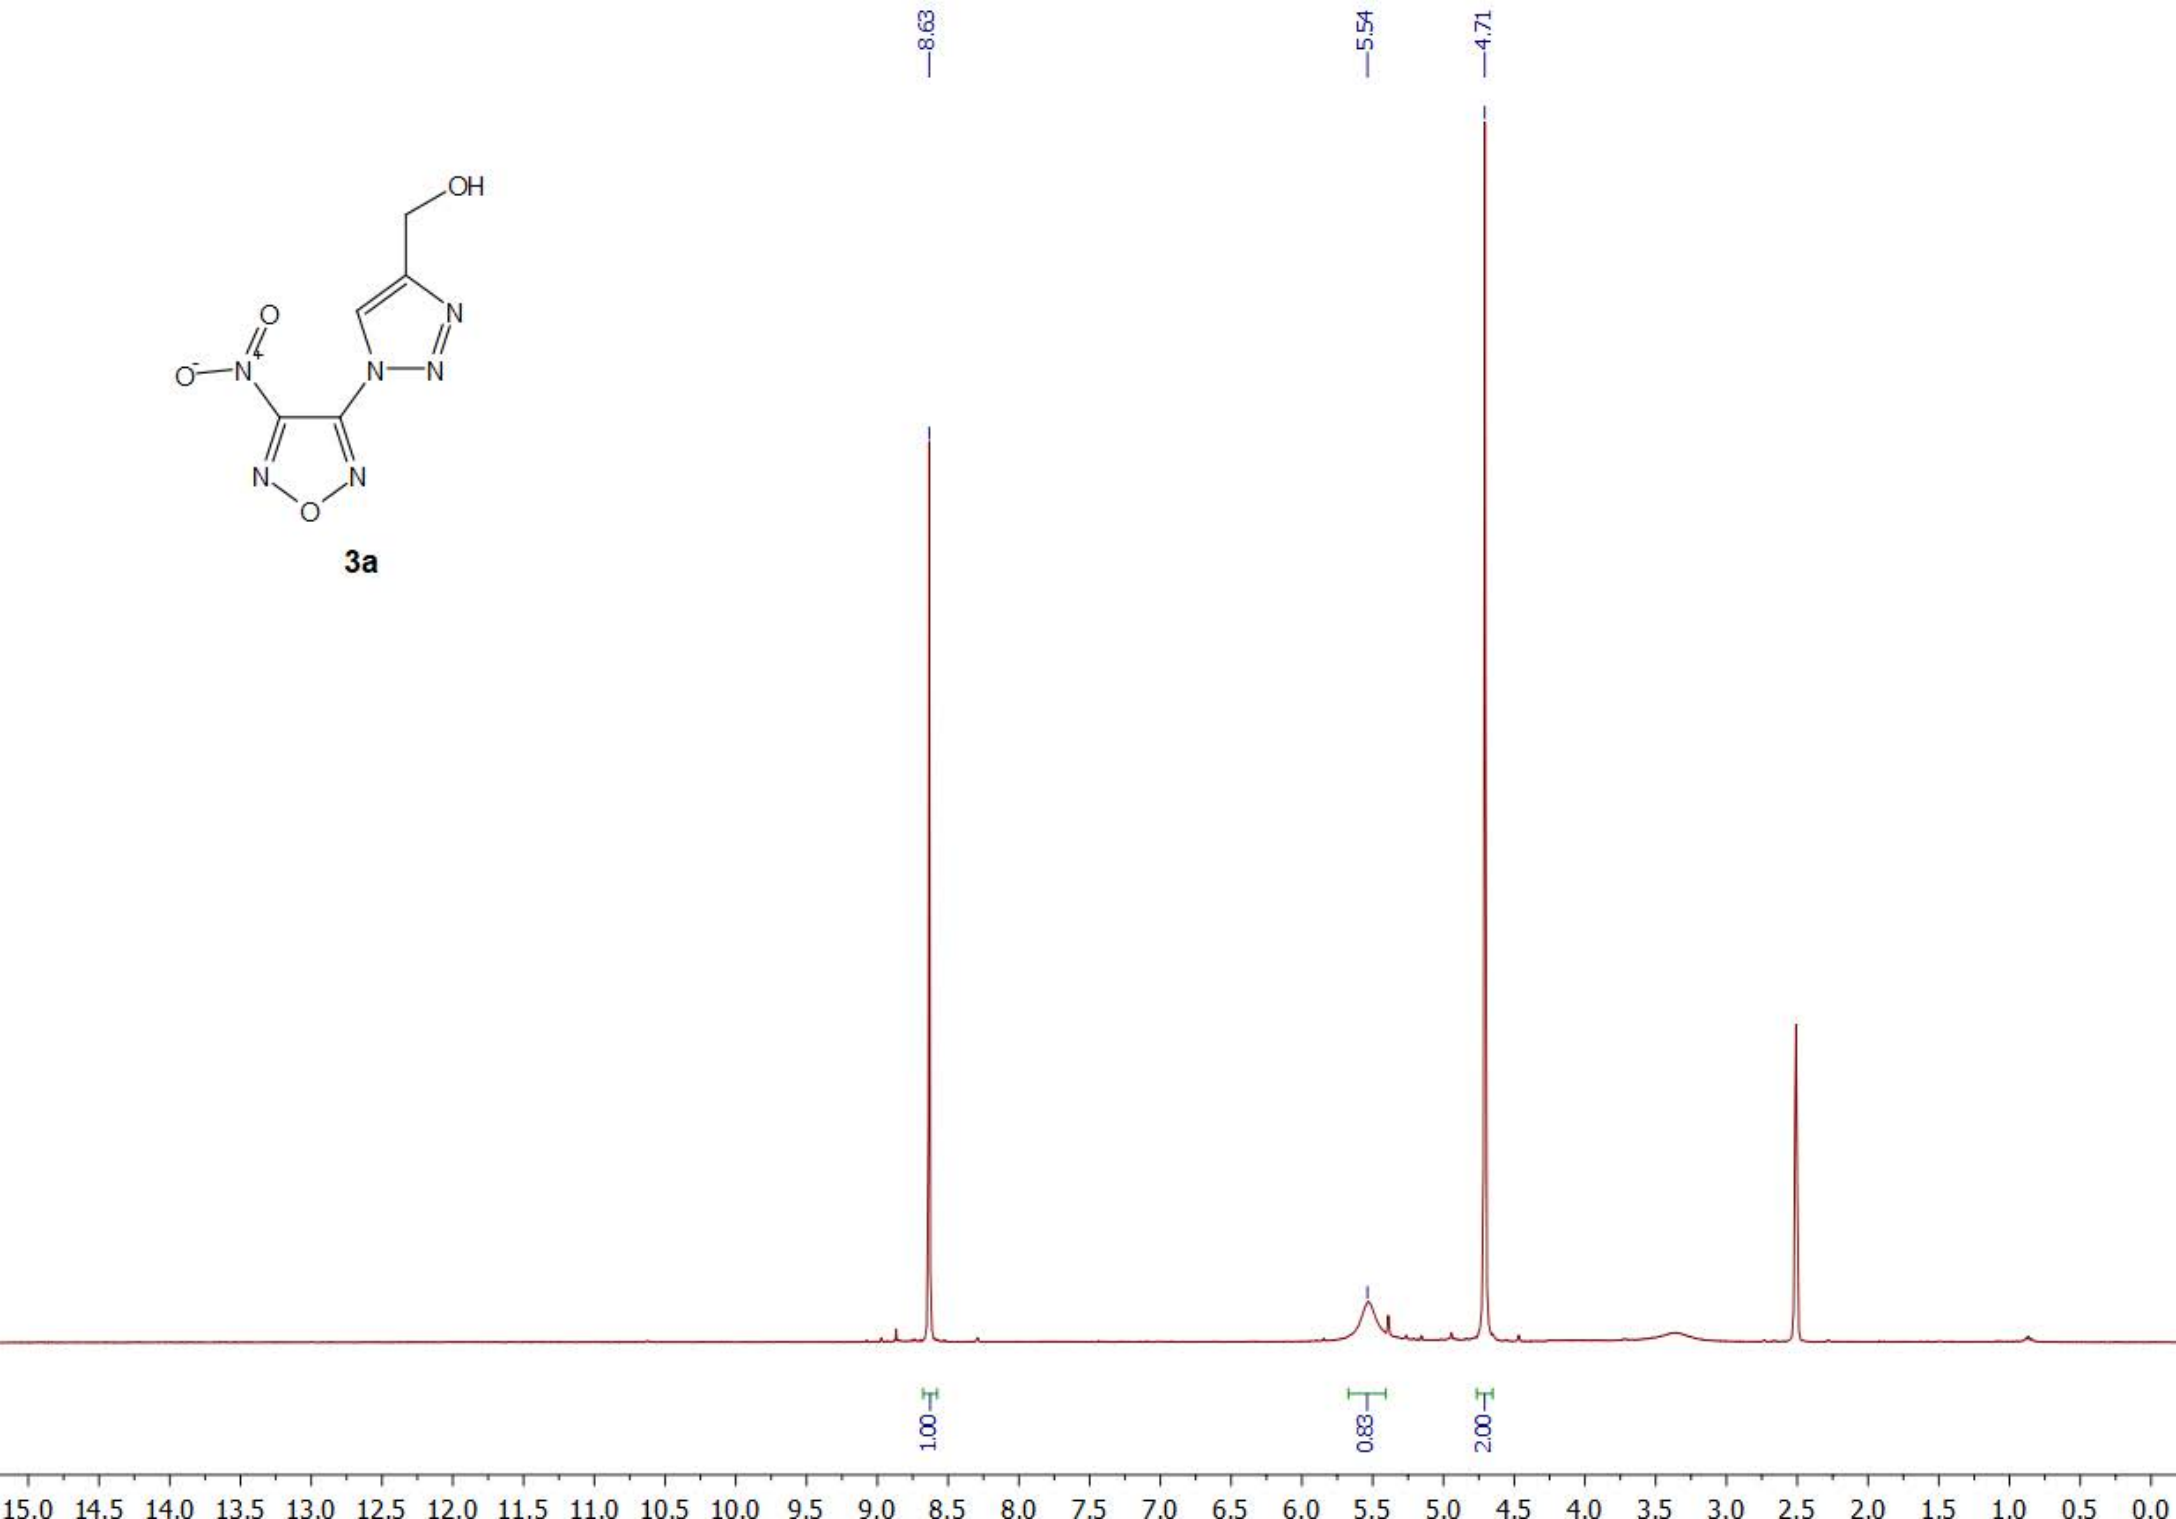



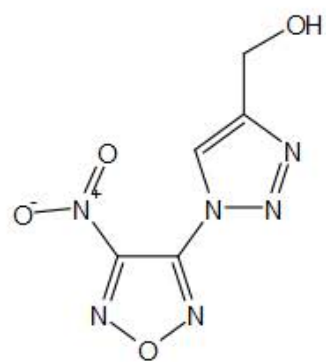

**3a**

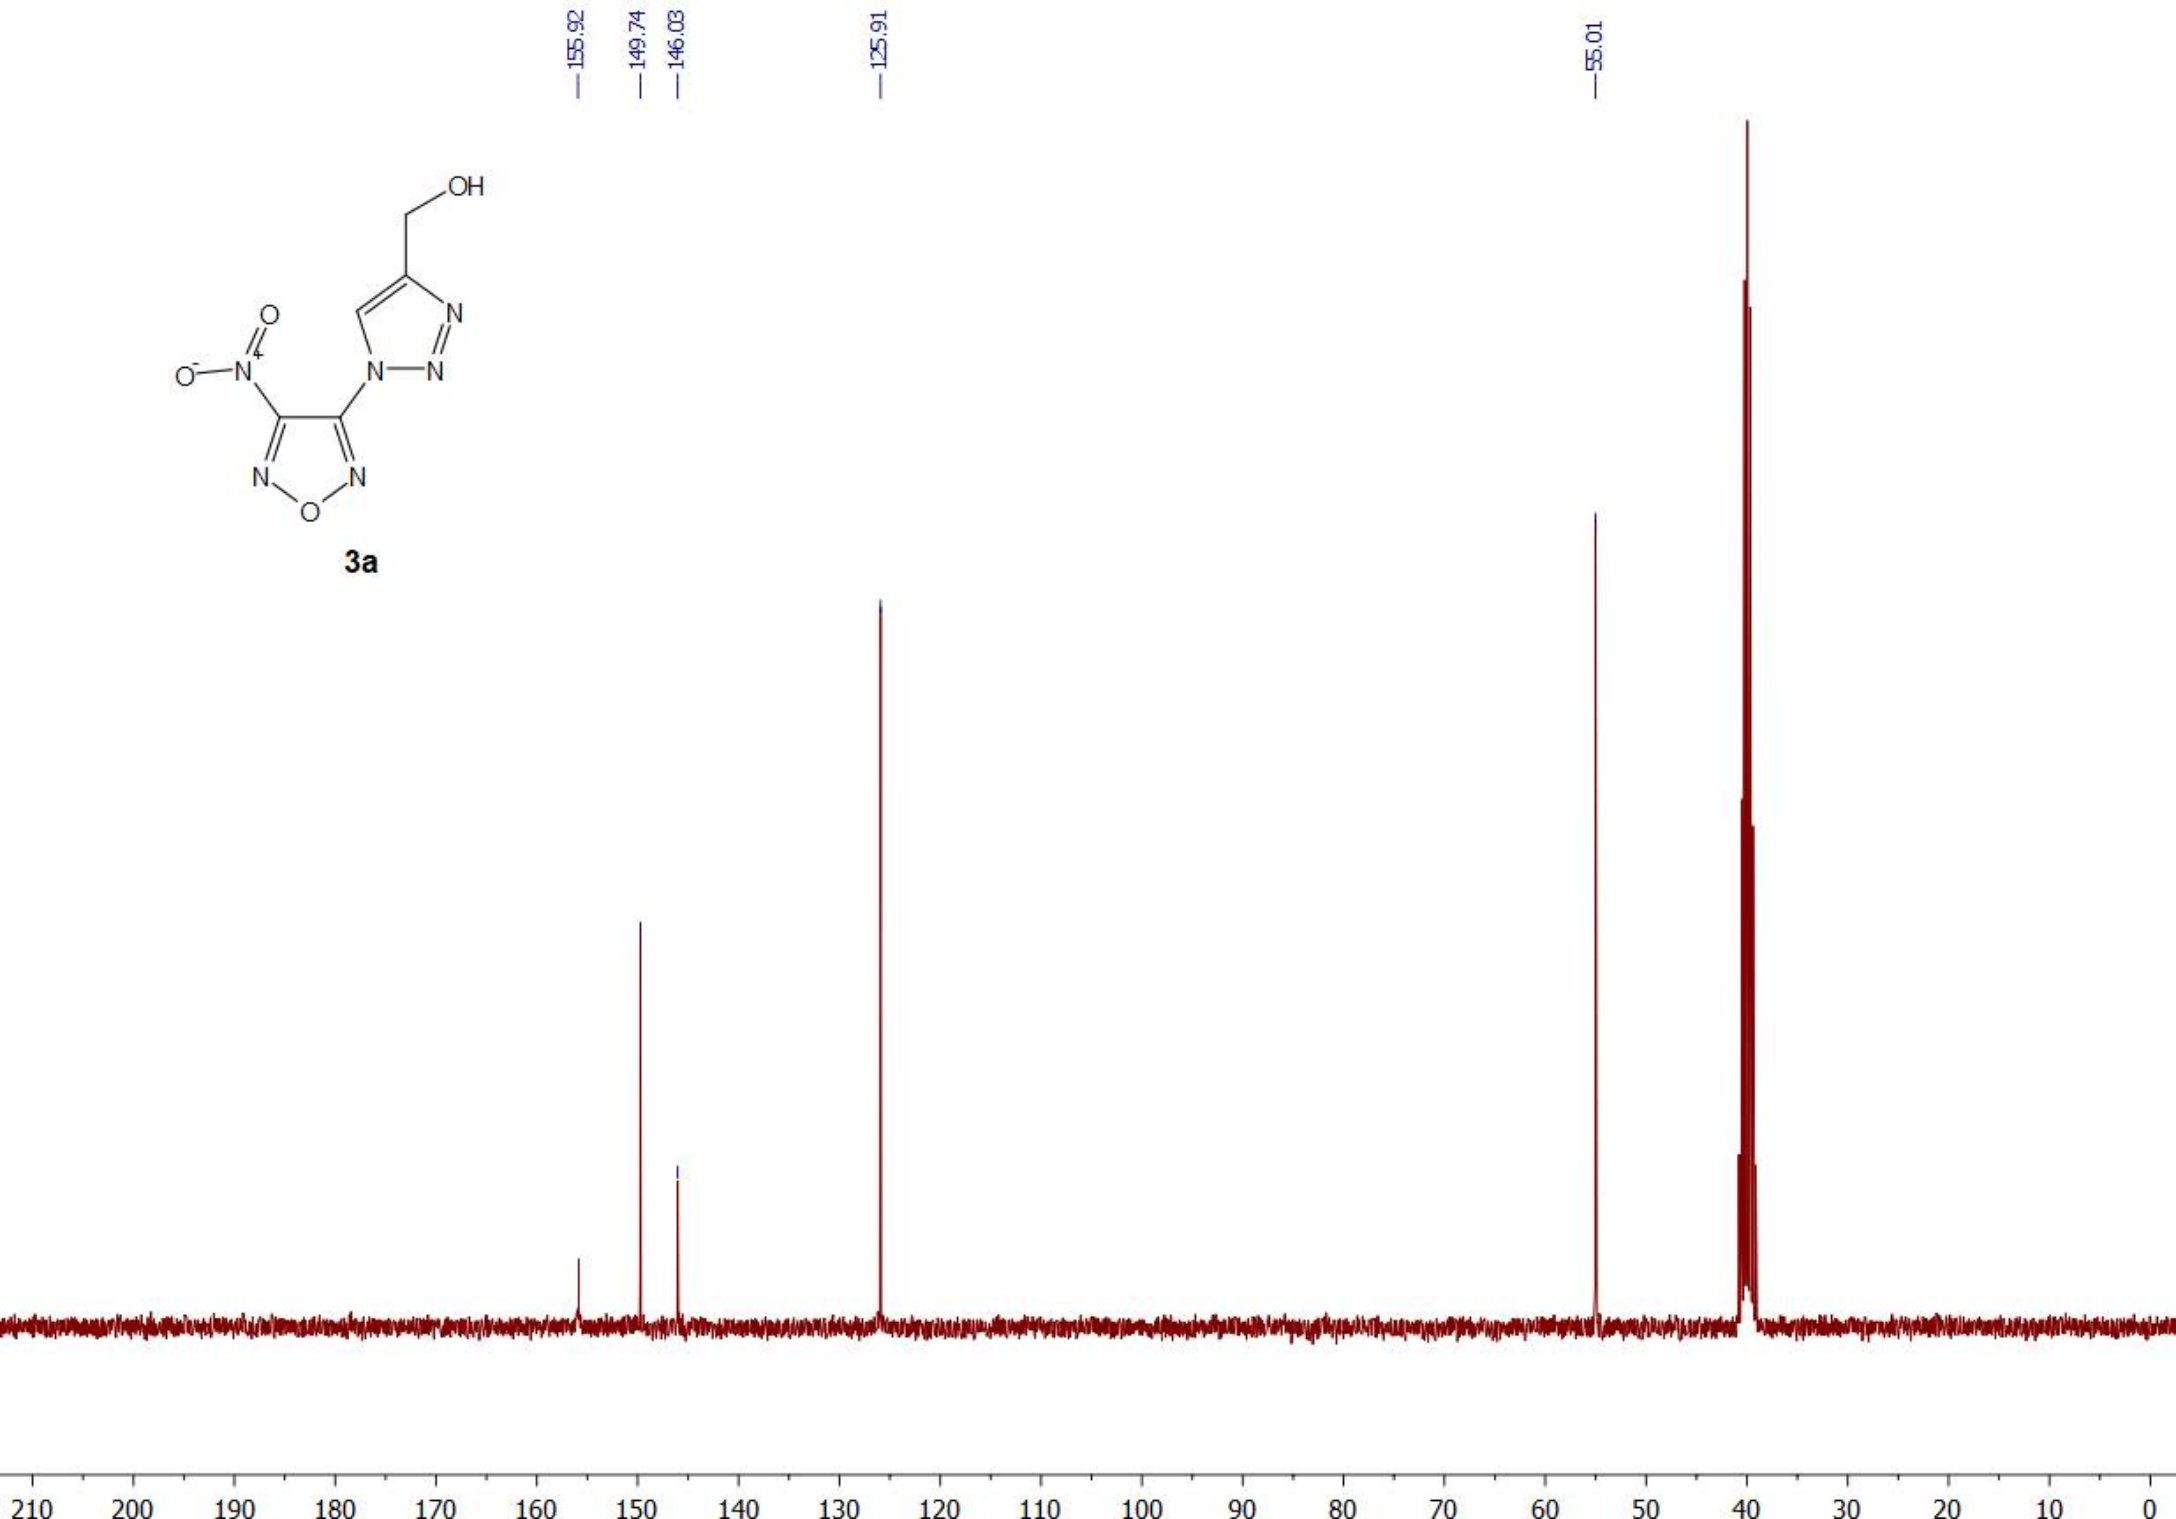

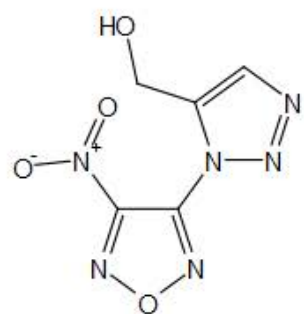

**3b**

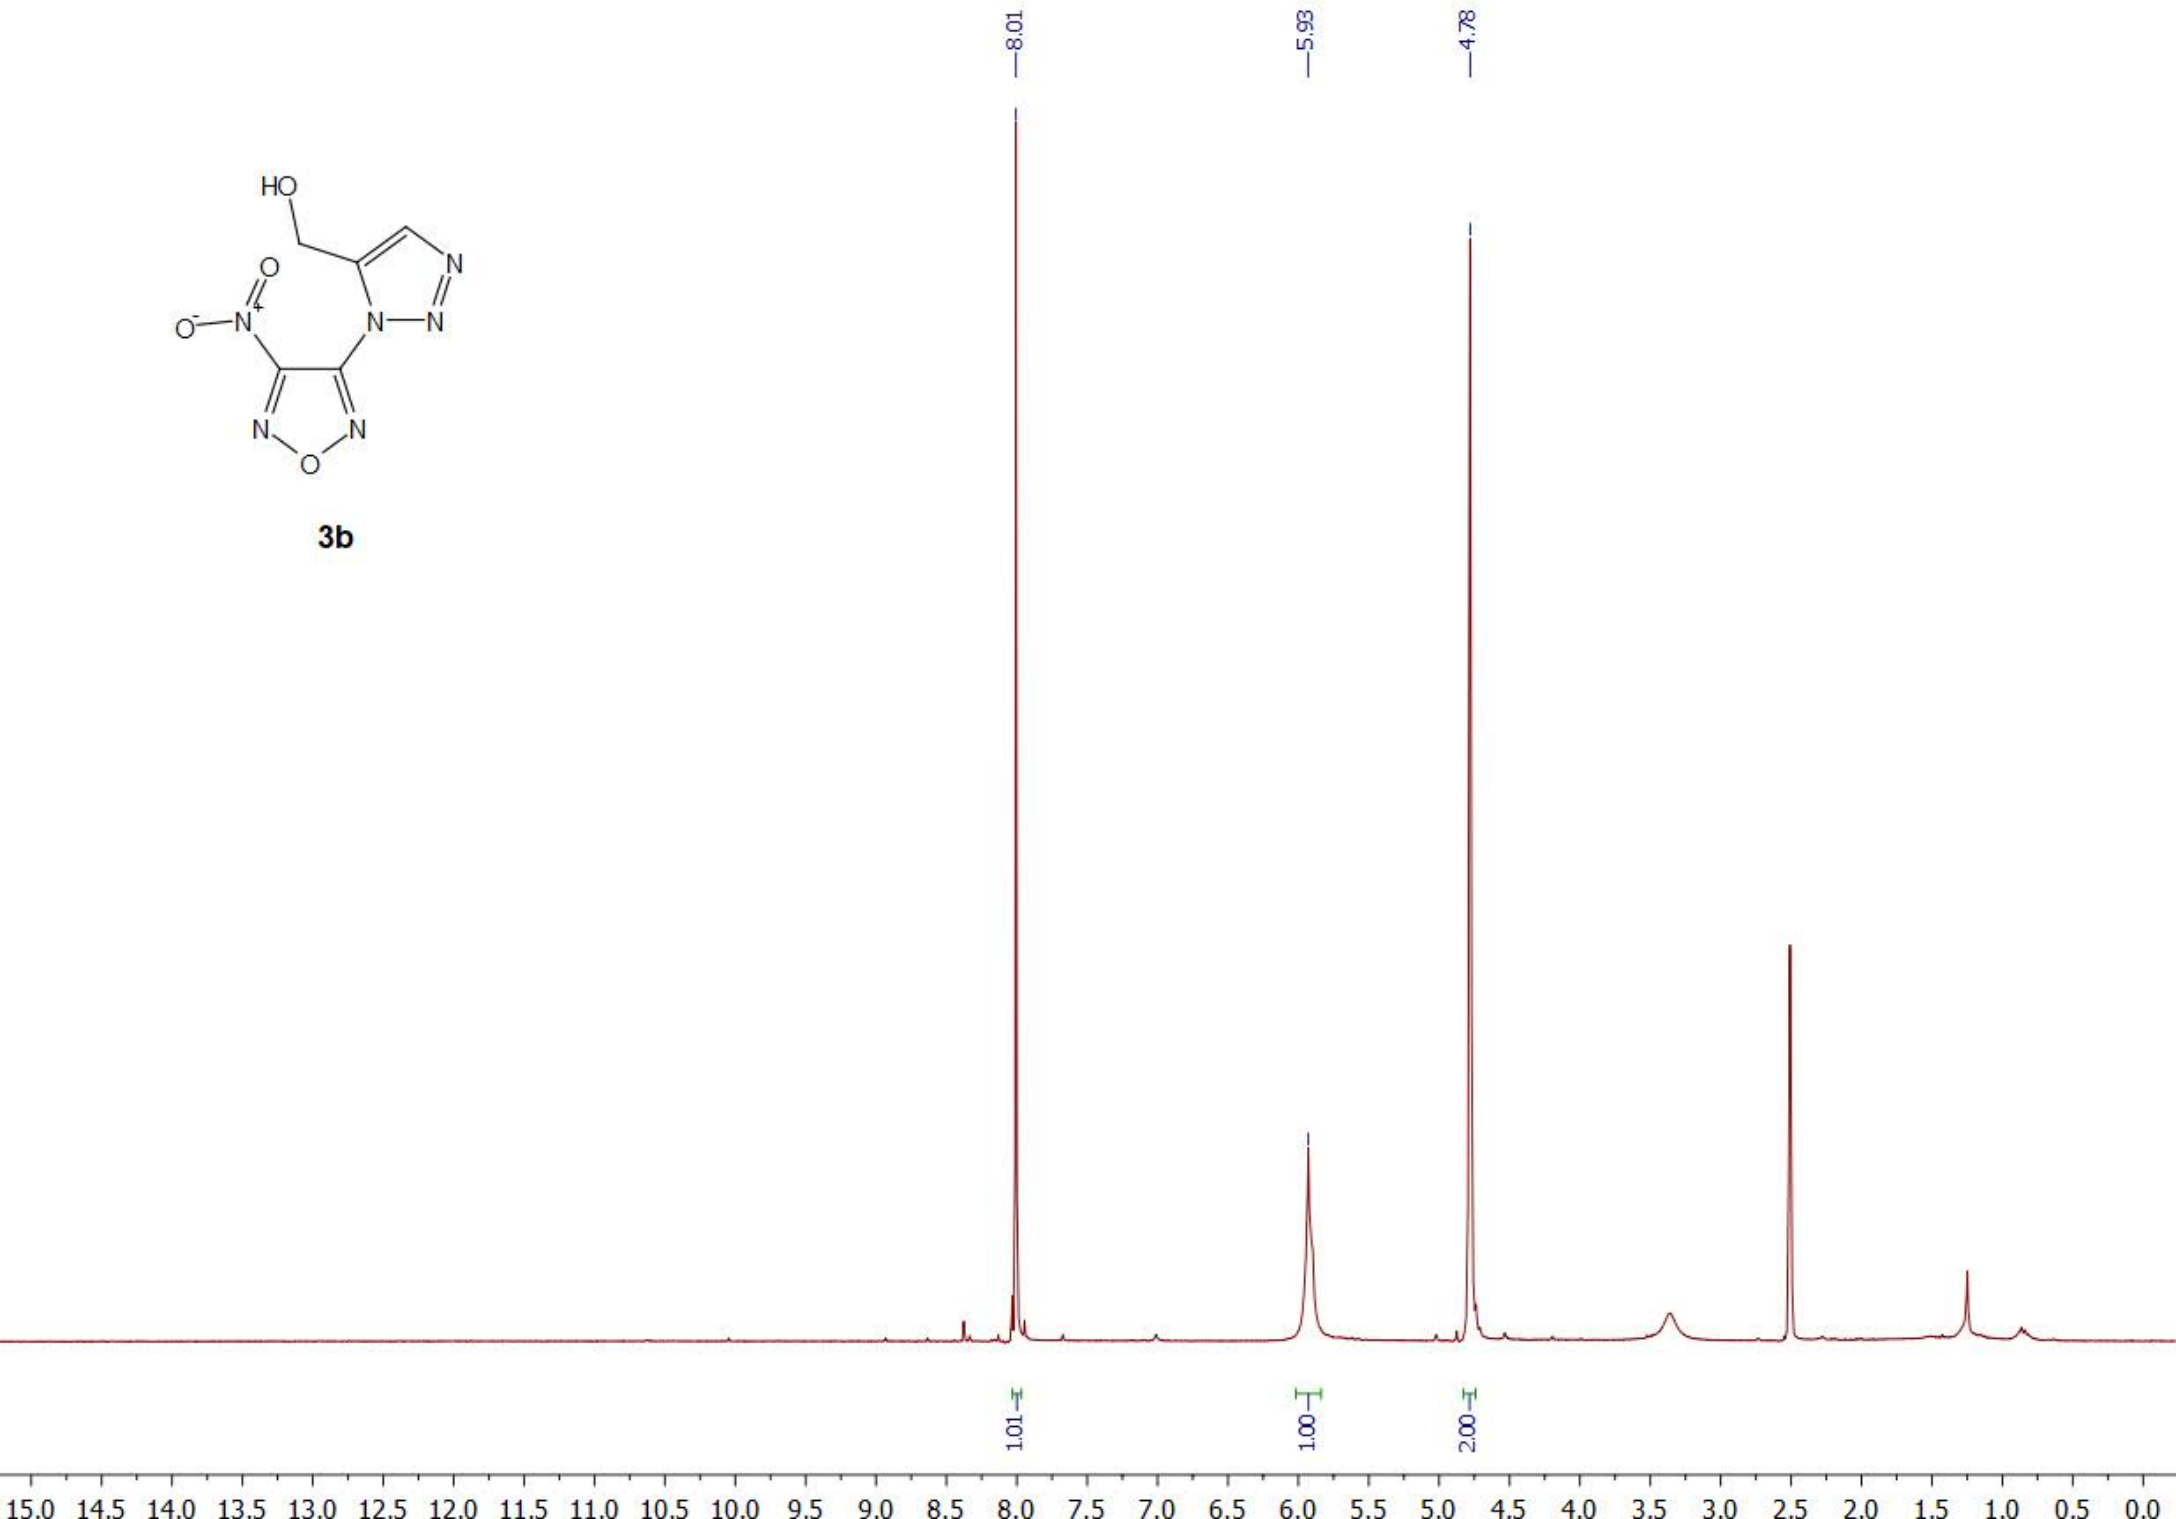

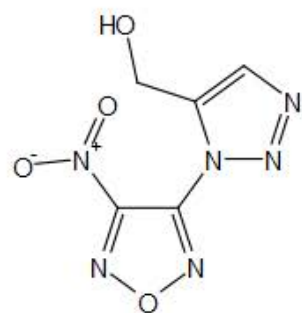

**3b**

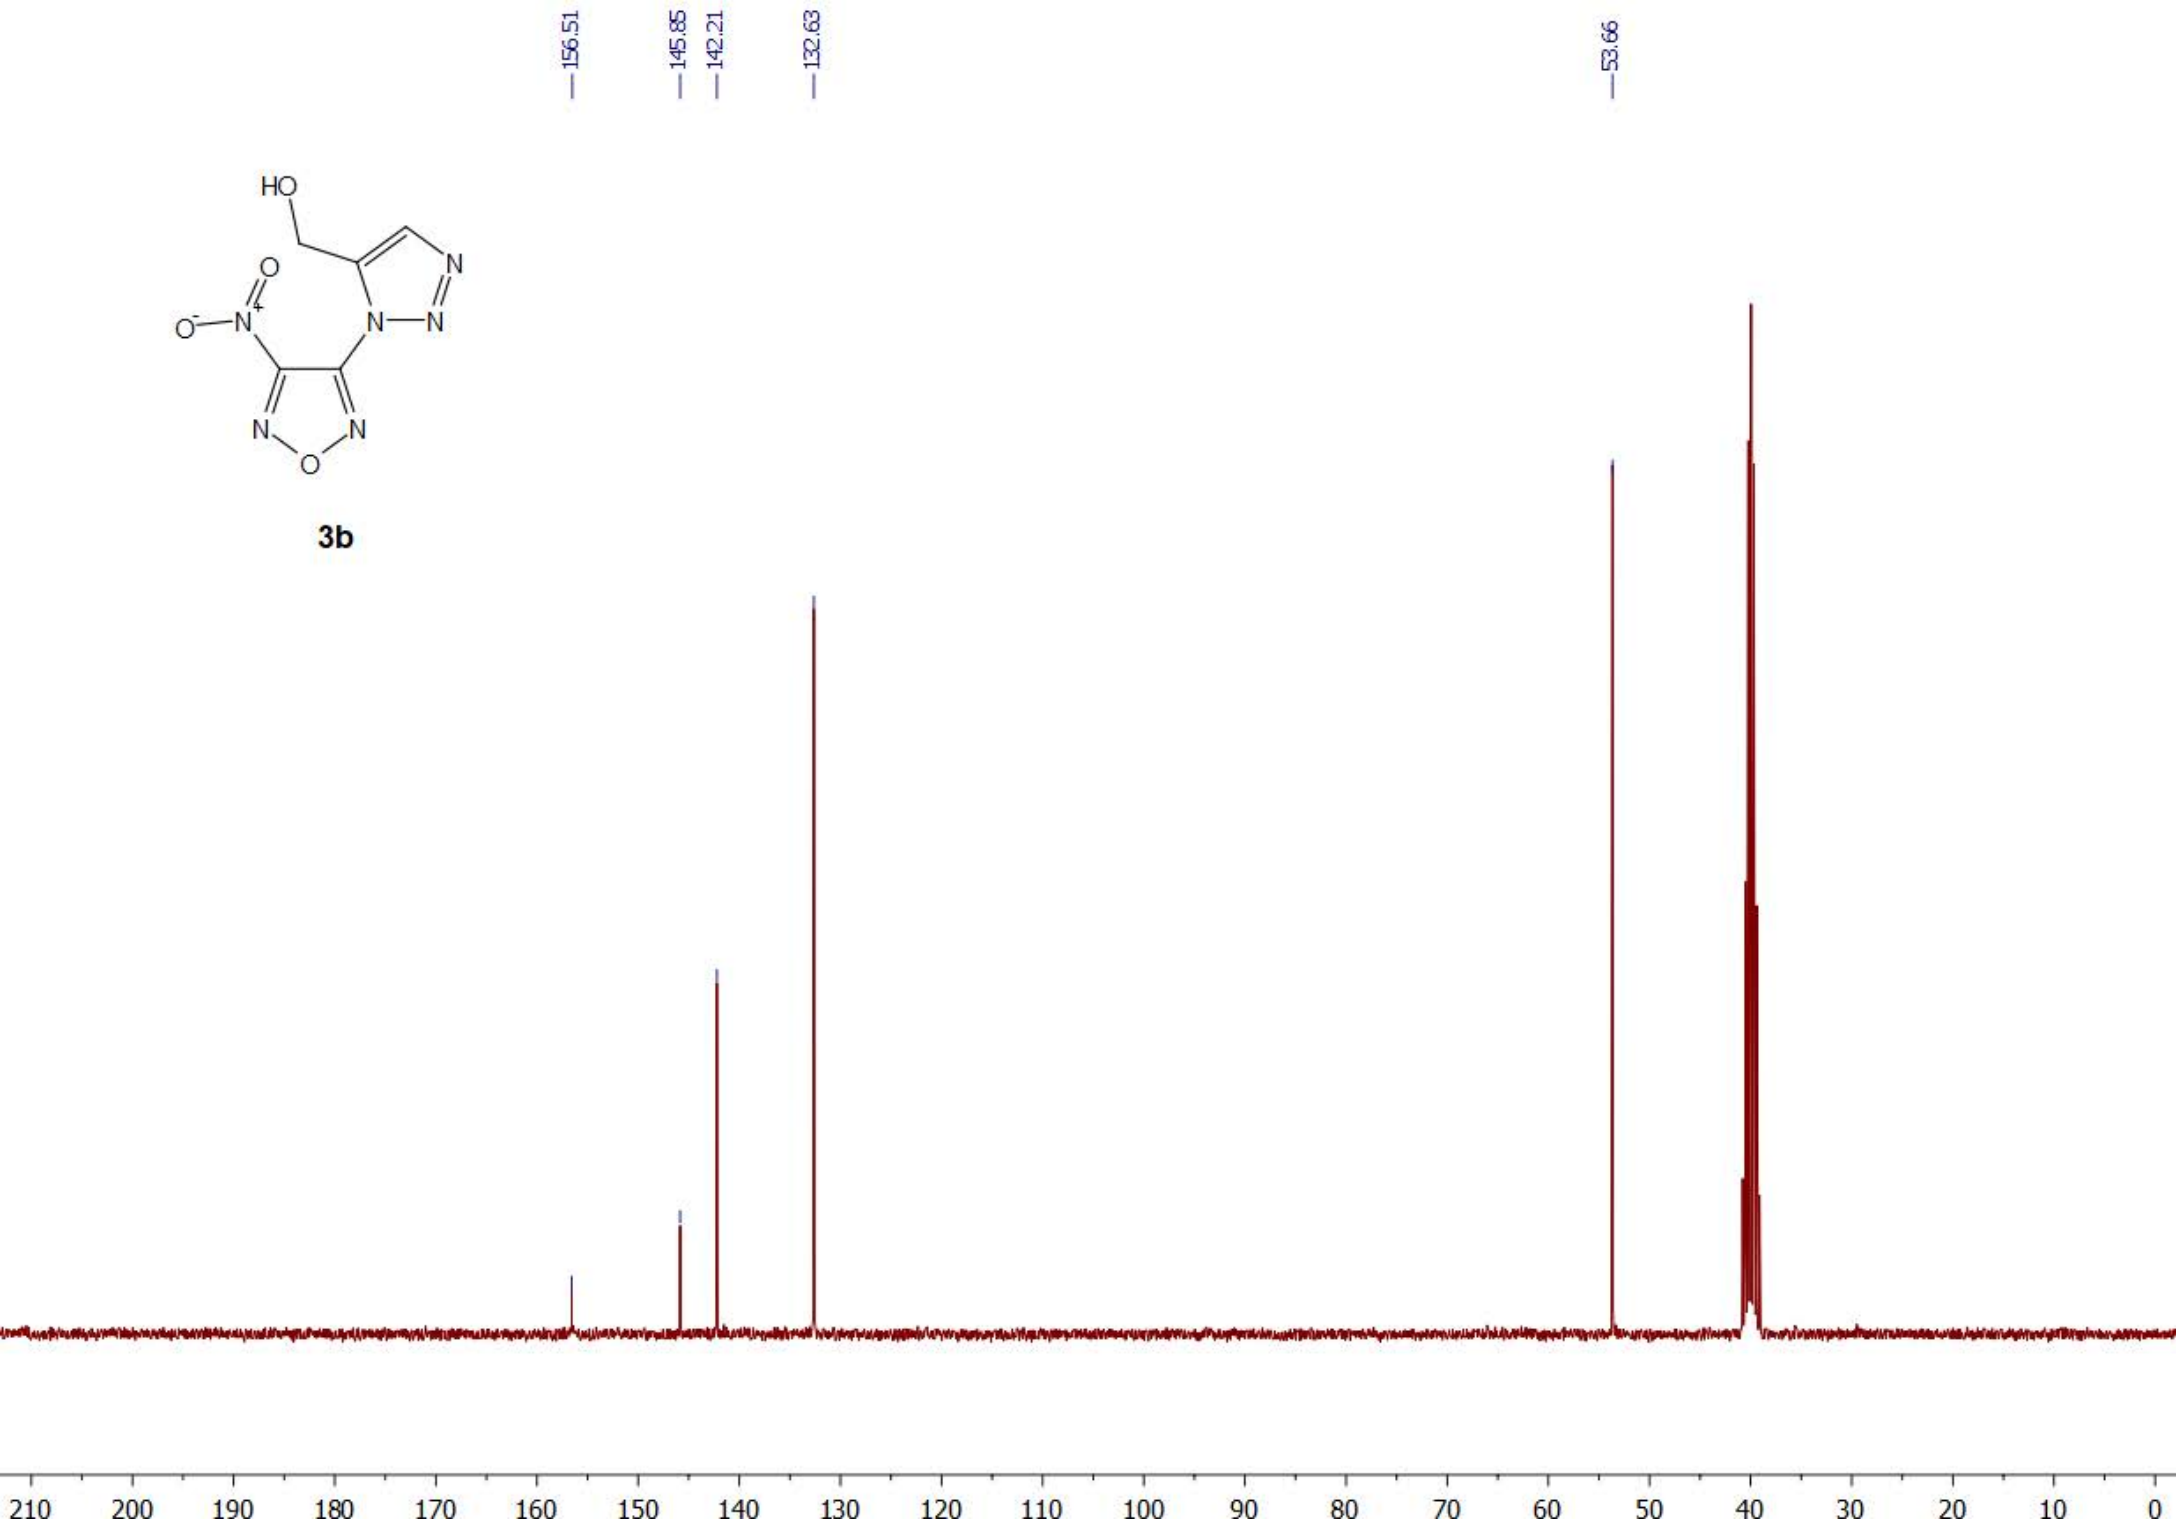

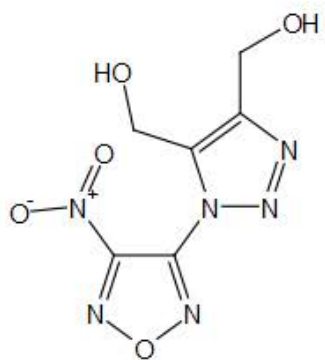

**3c**

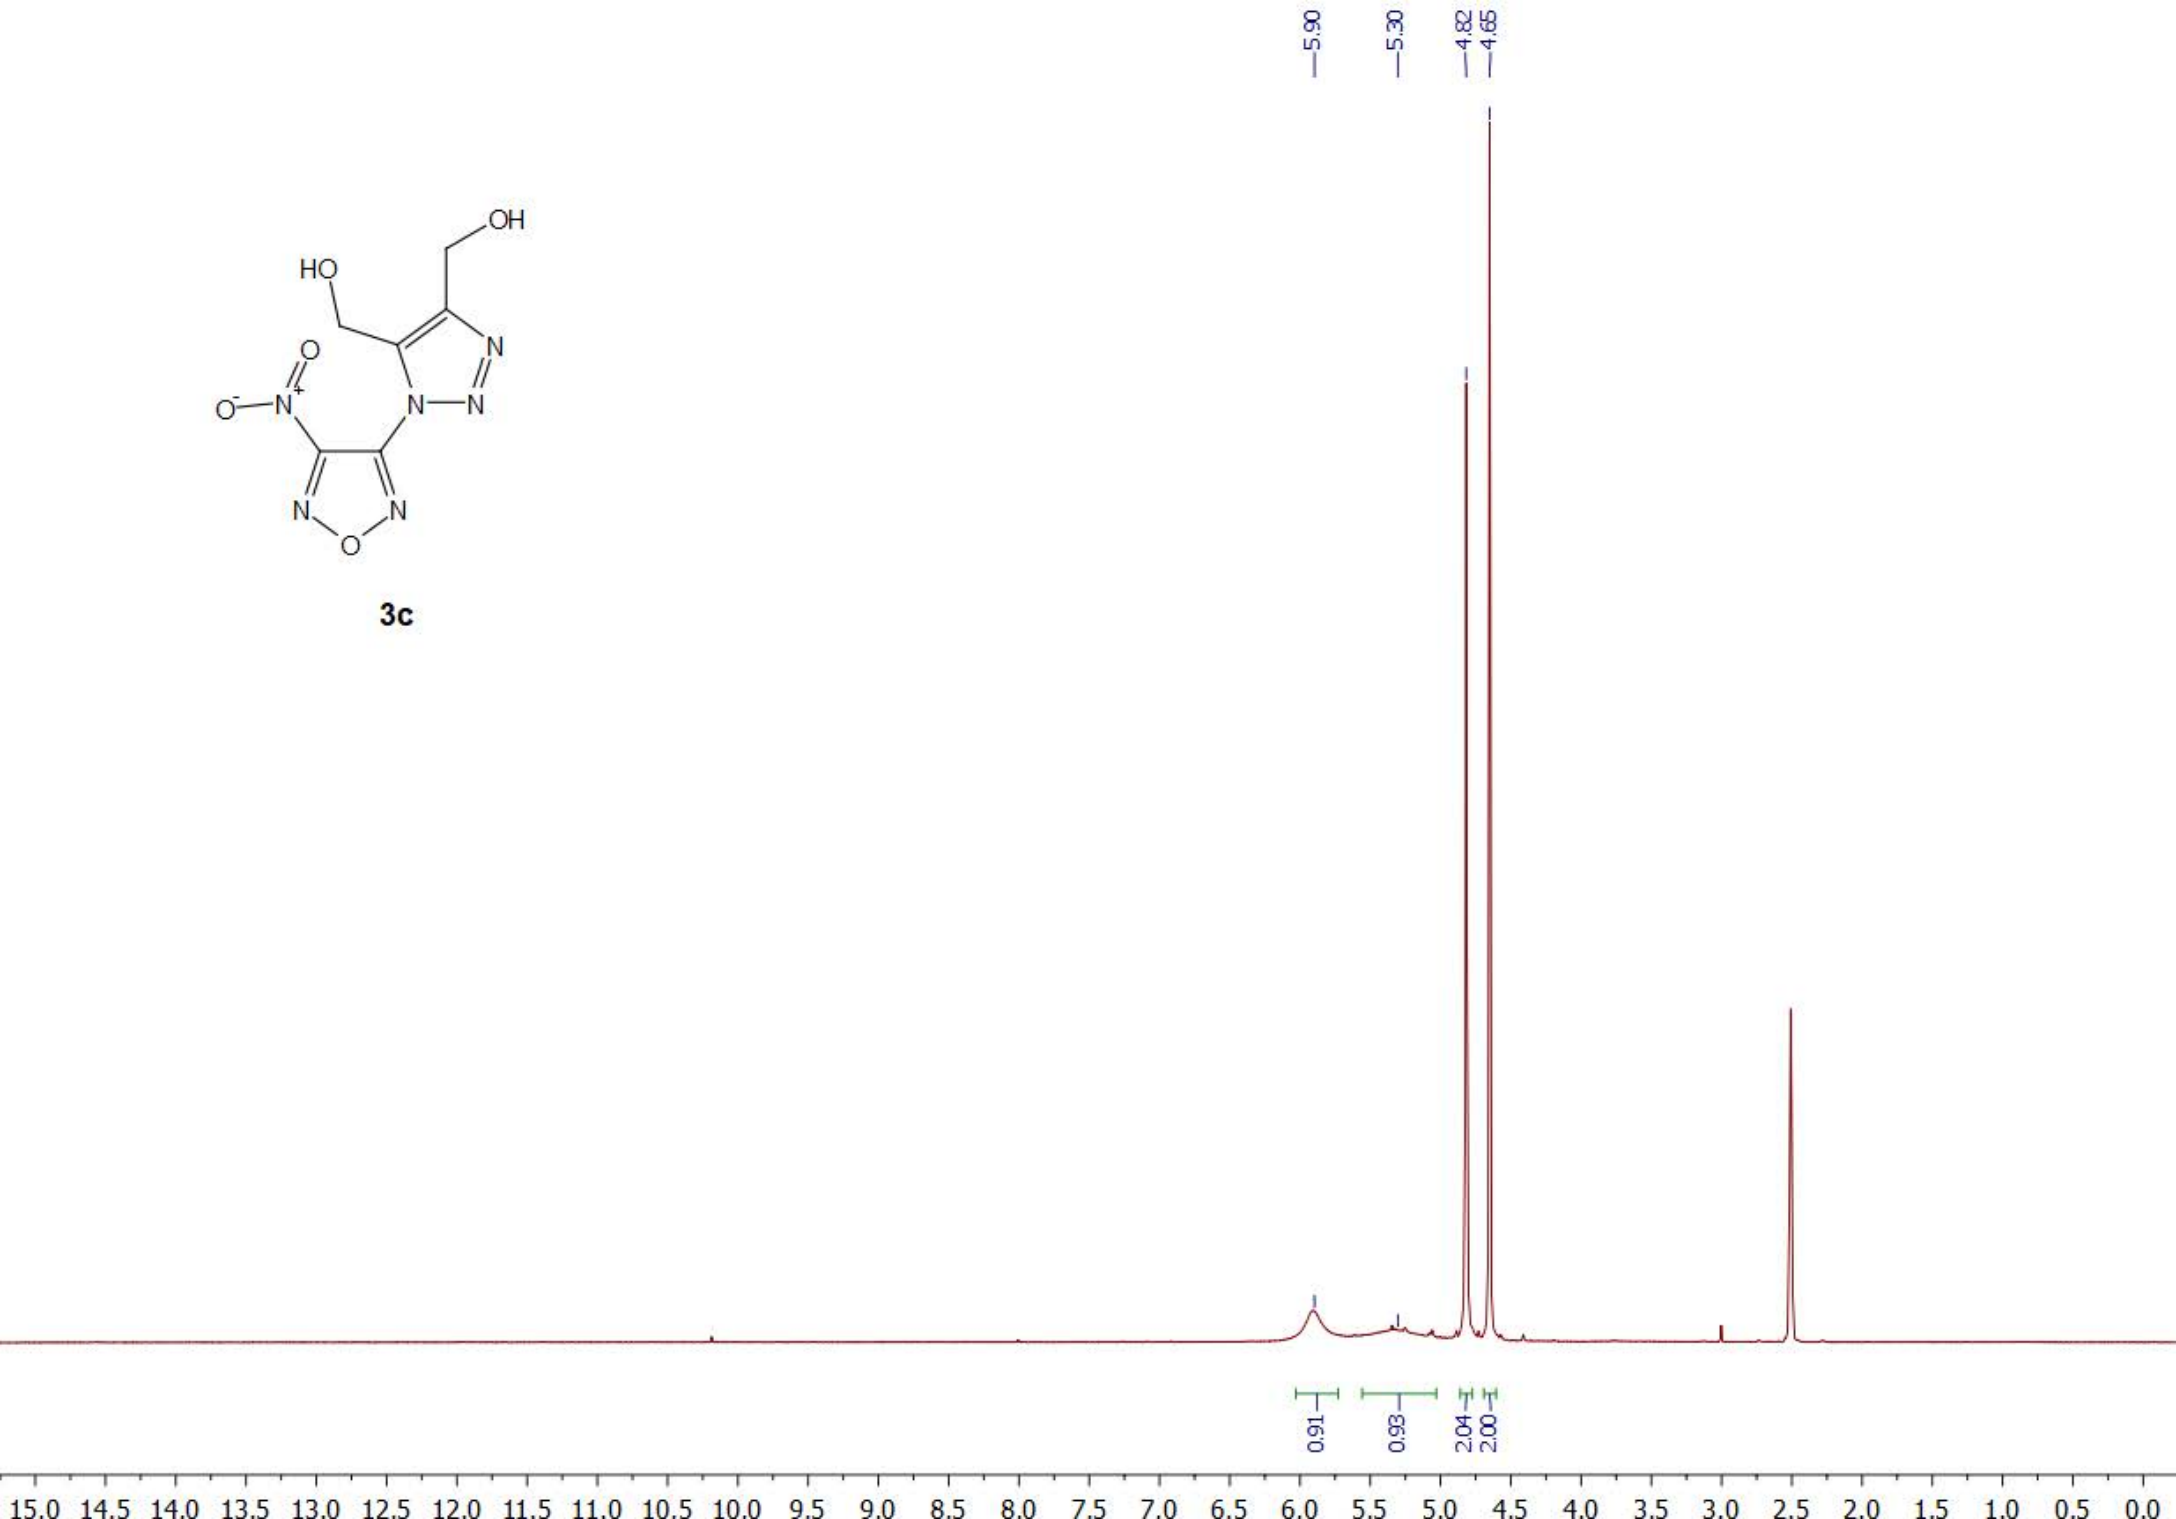



**3c**

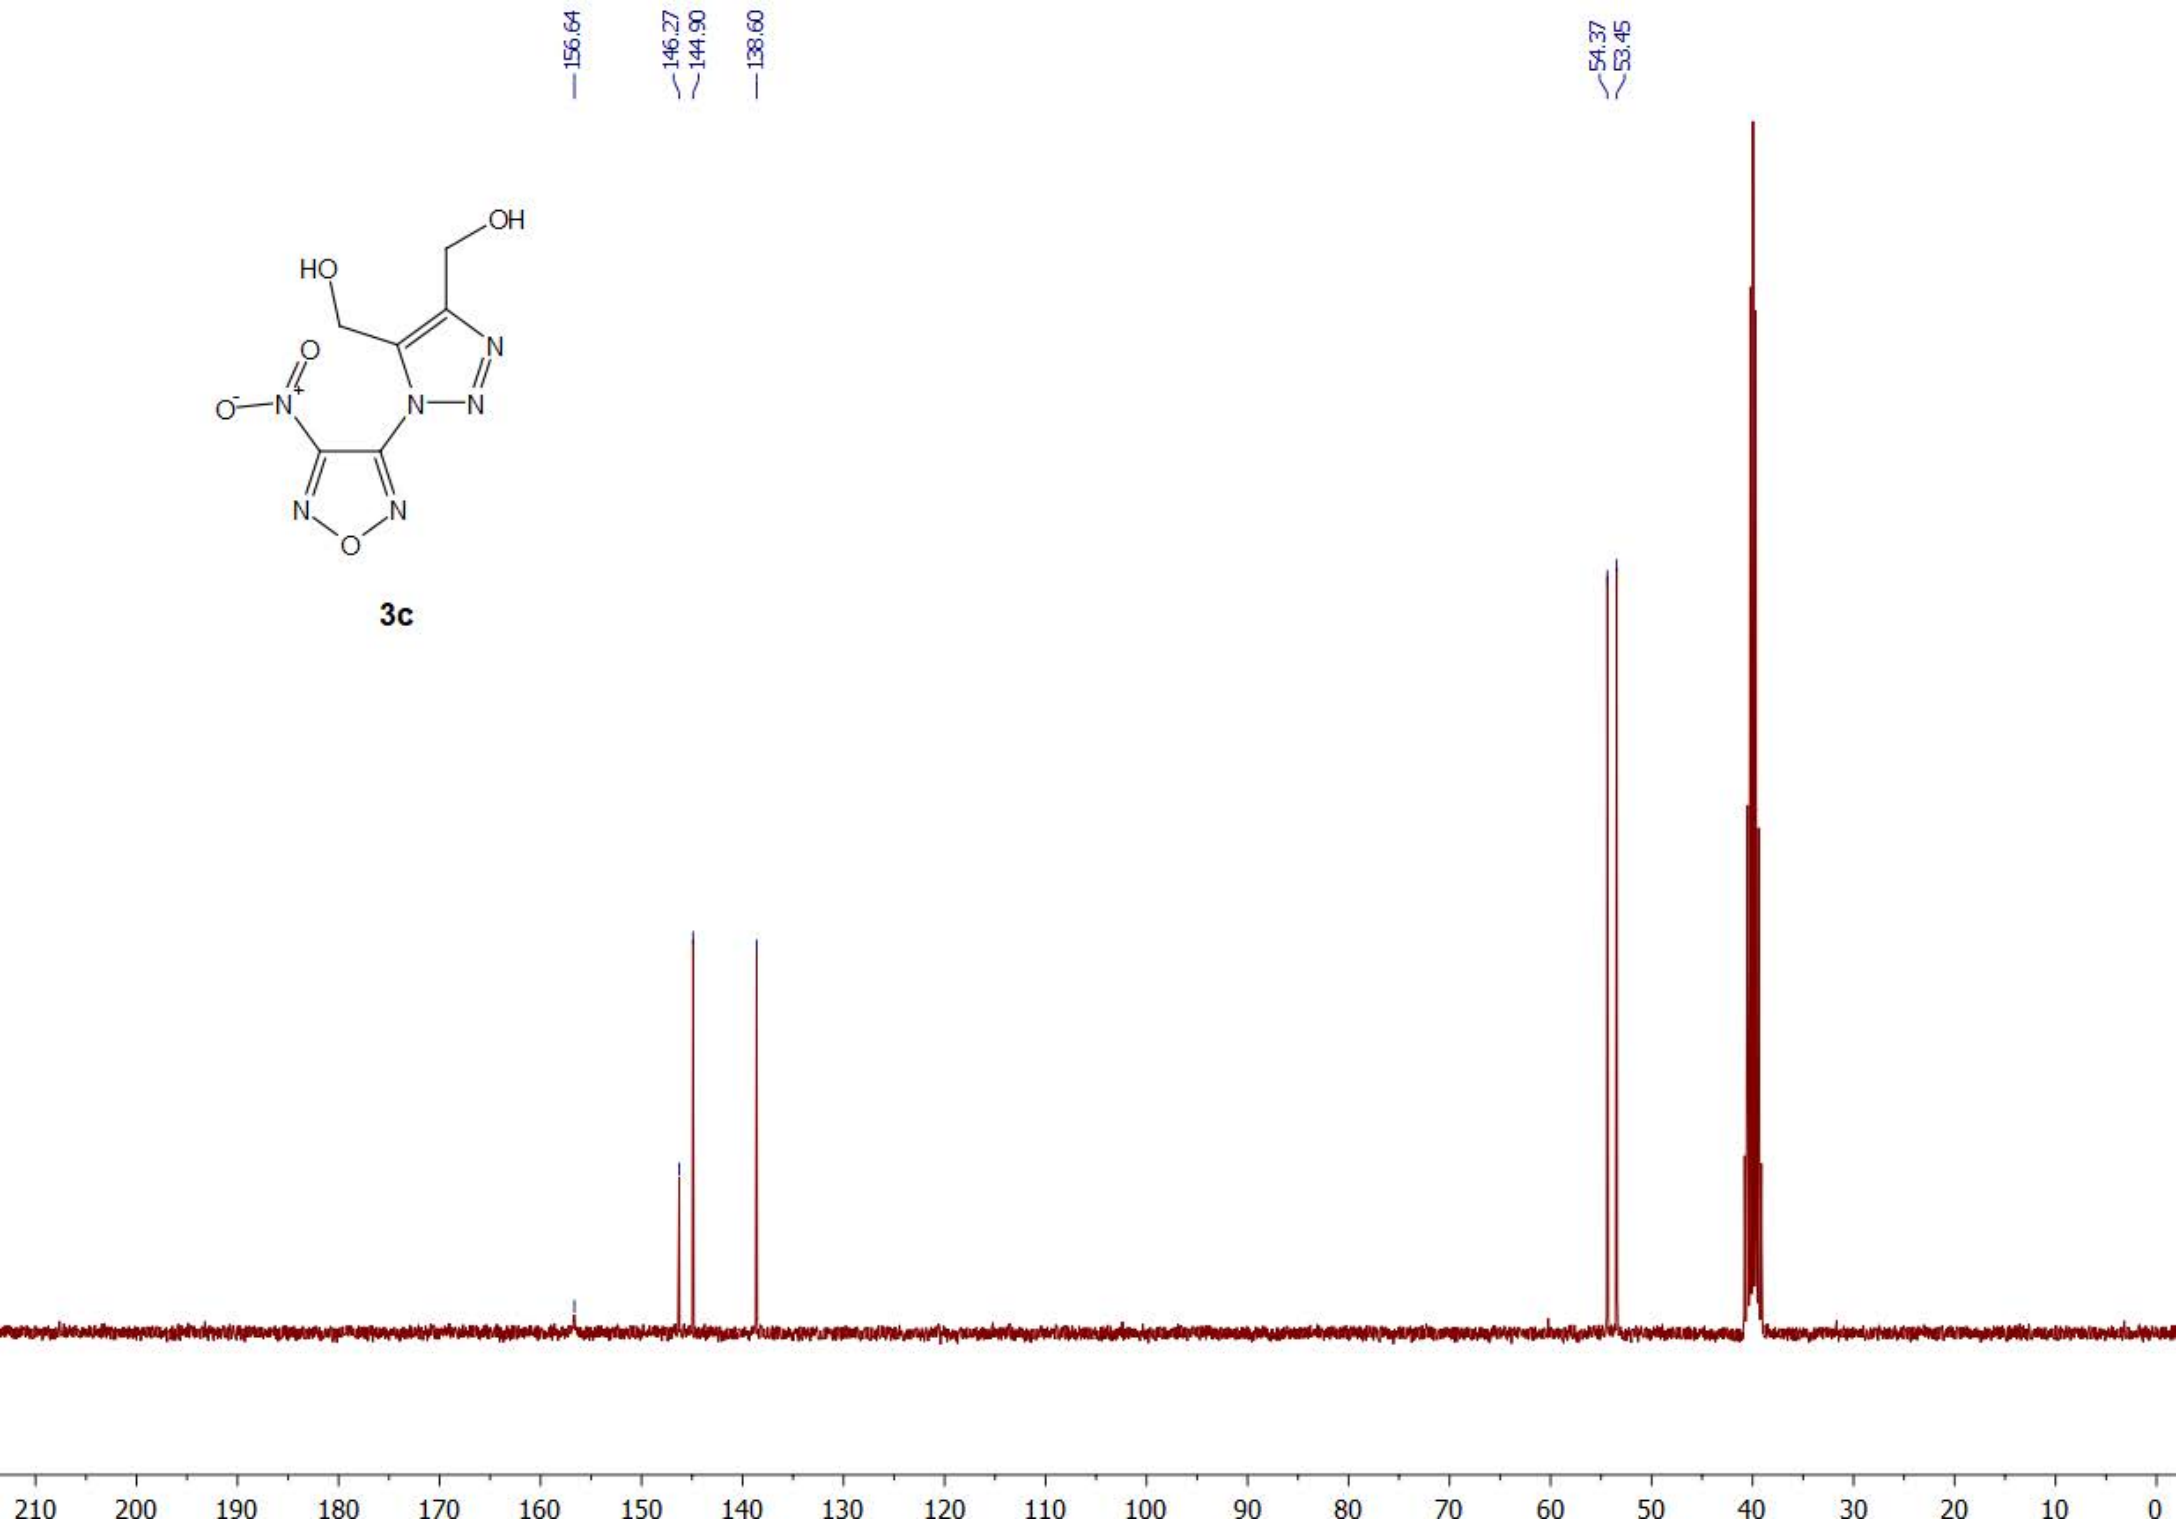

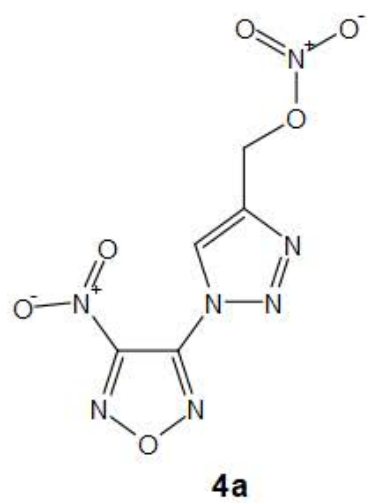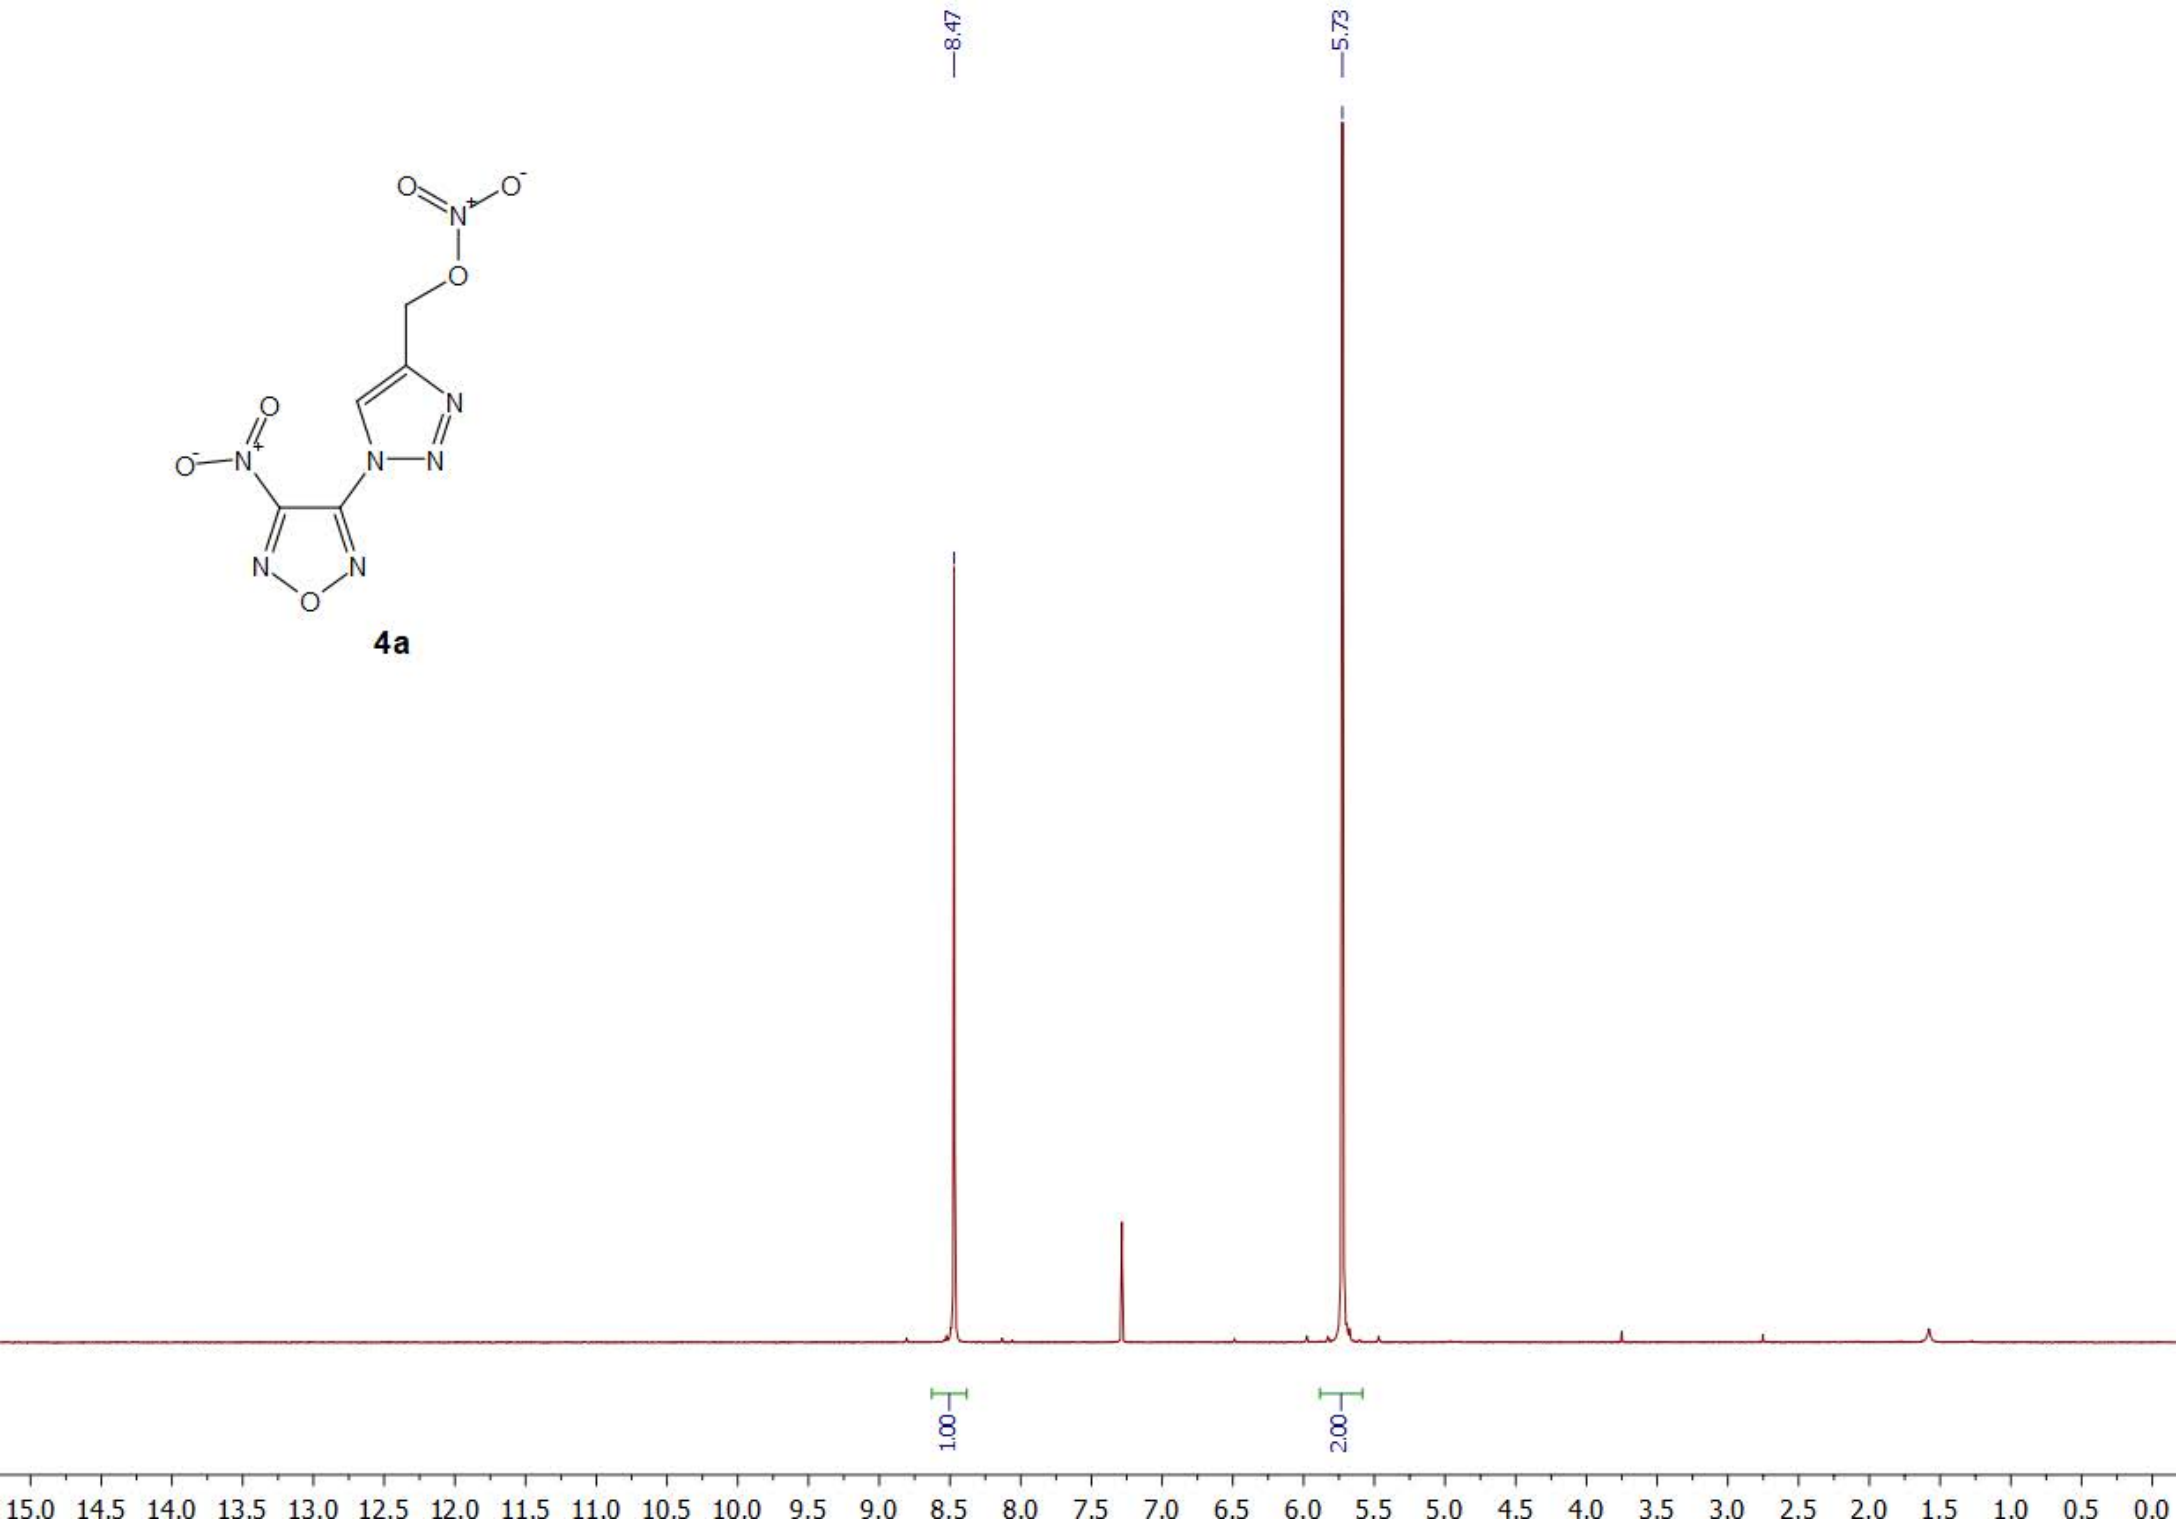

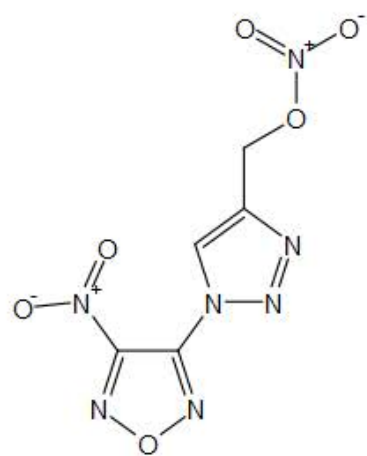

**4a**

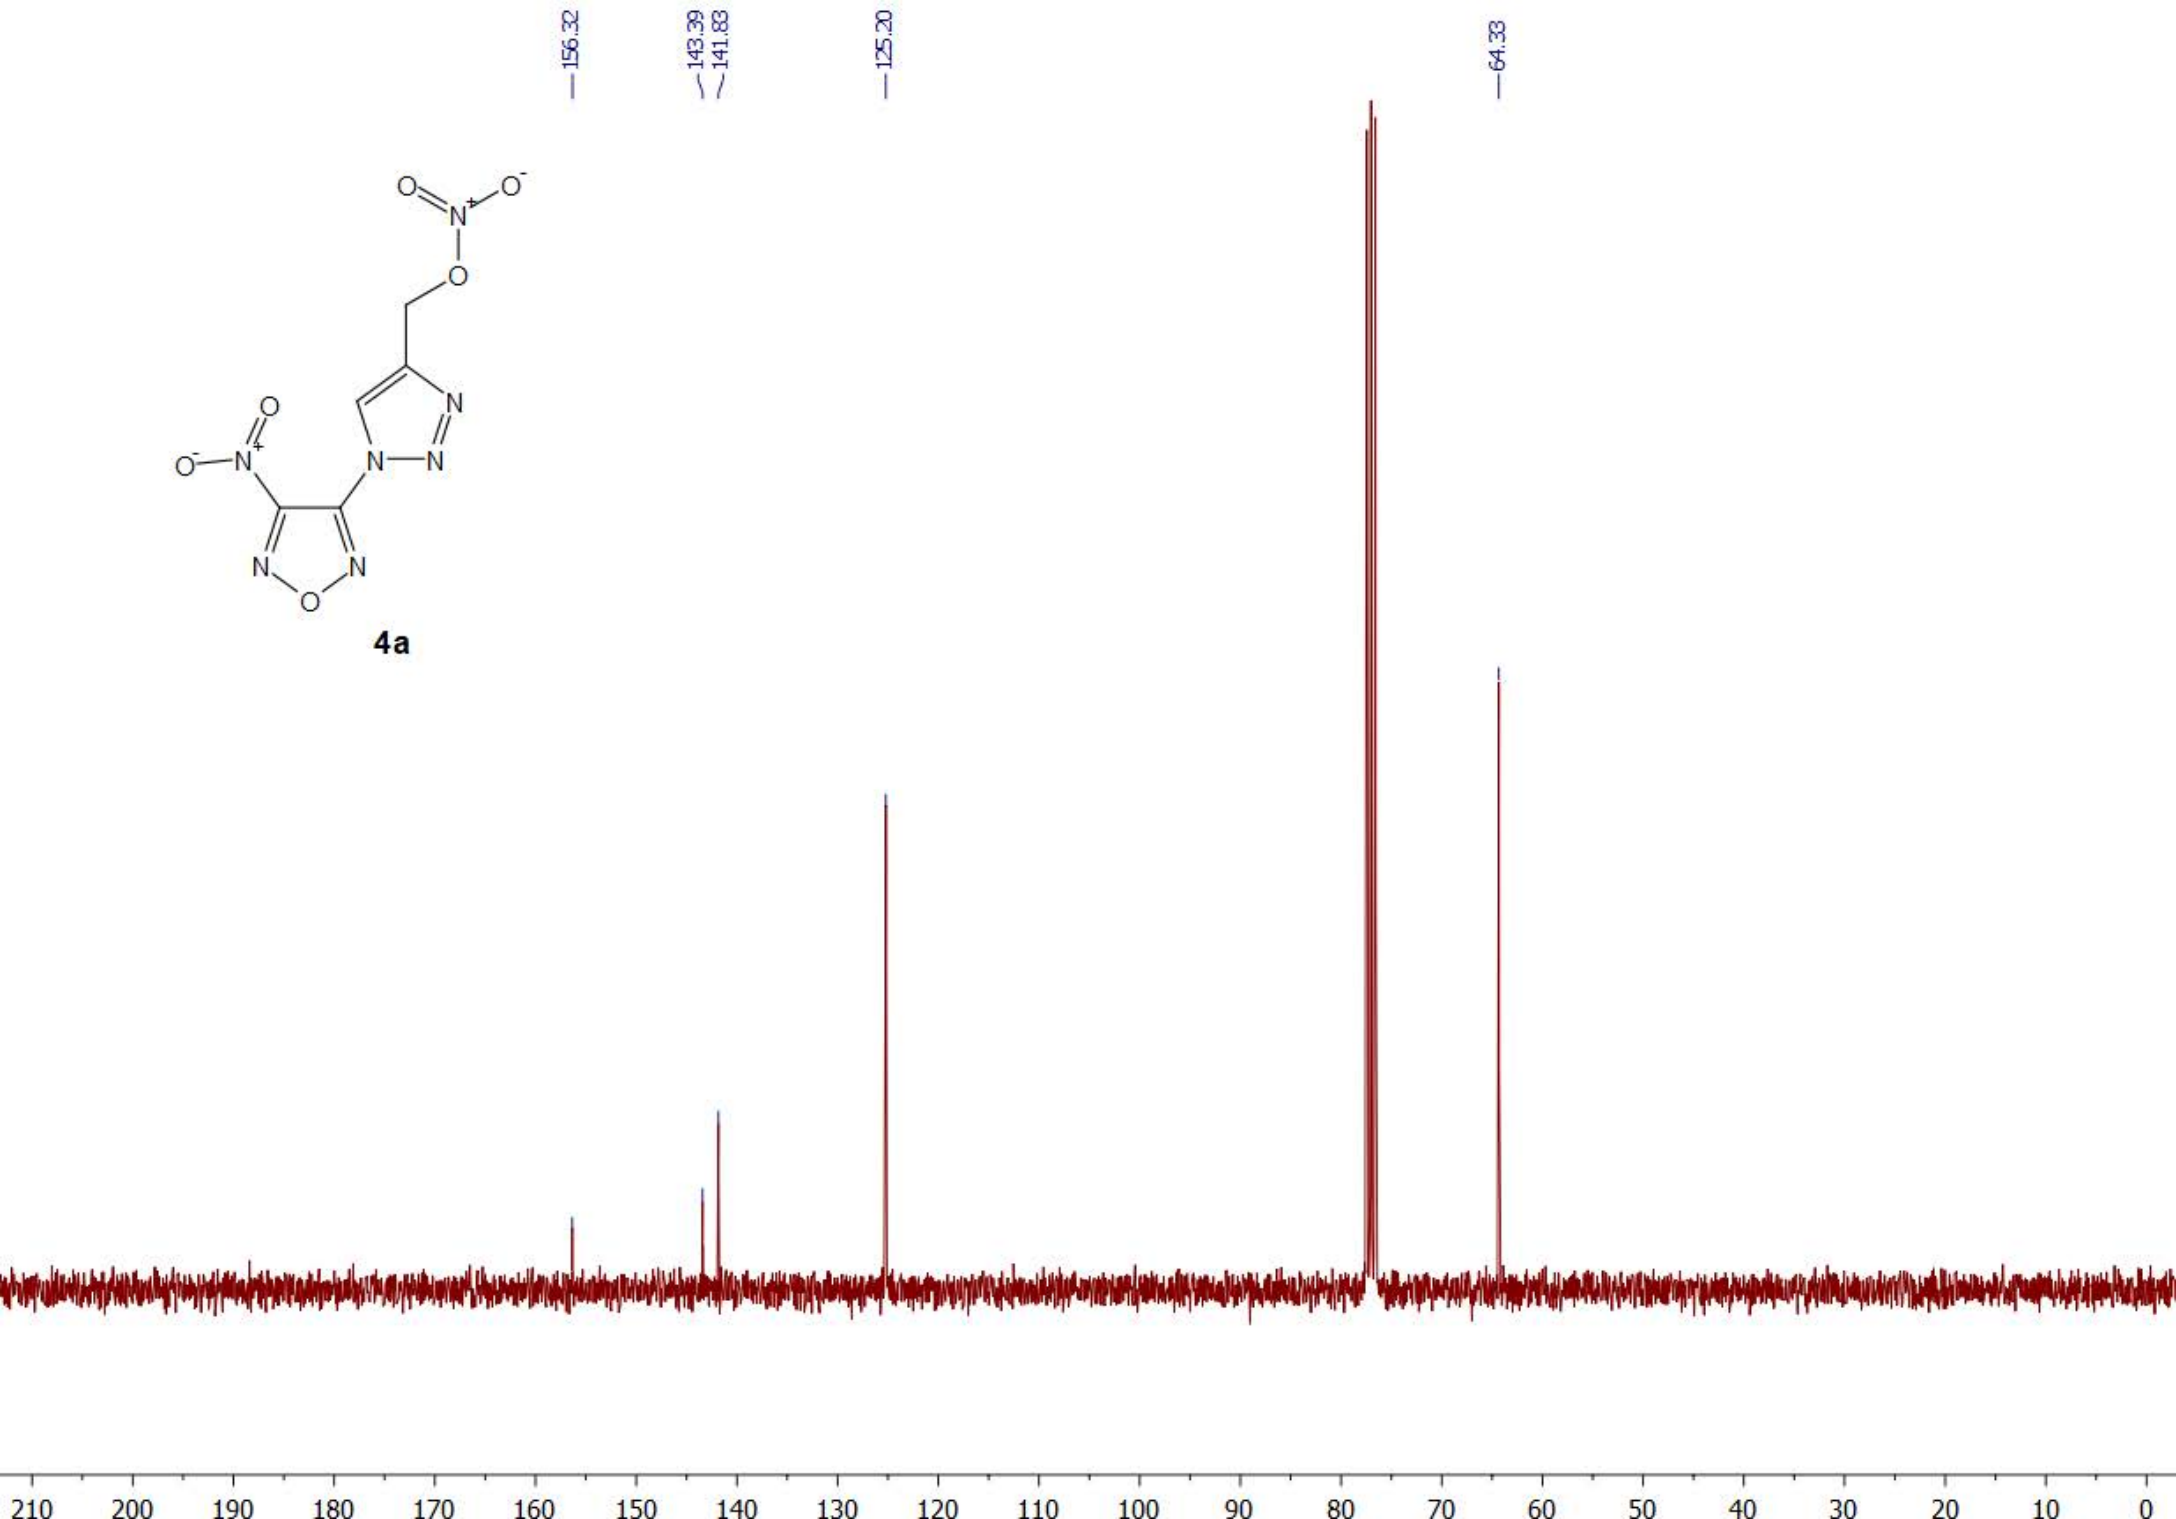

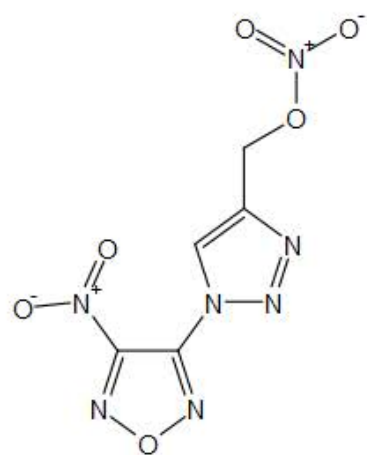

**4a**

— -39.39  
— -46.02

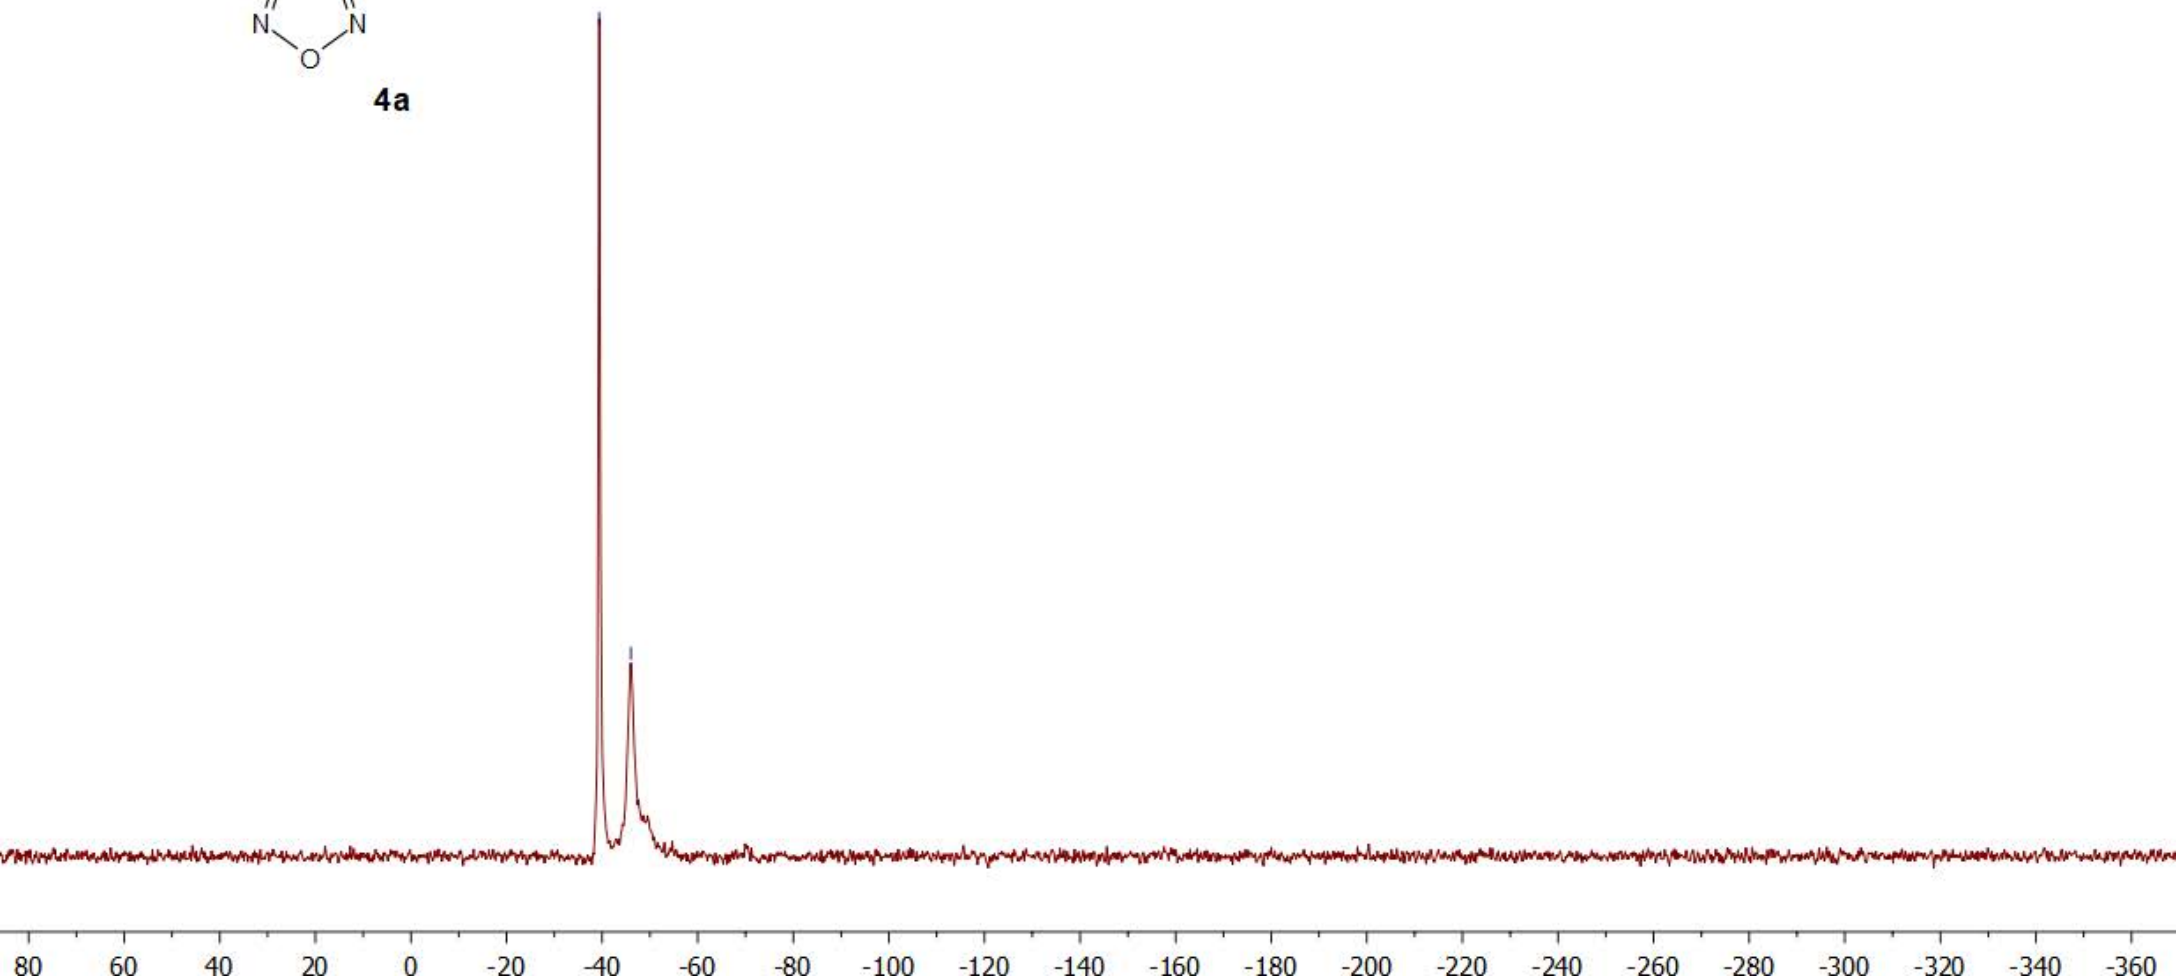



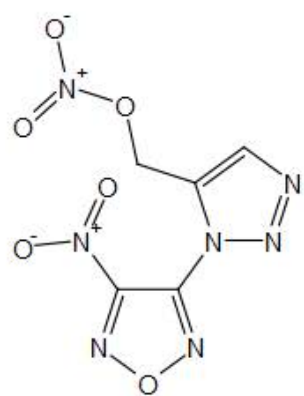

**4b**

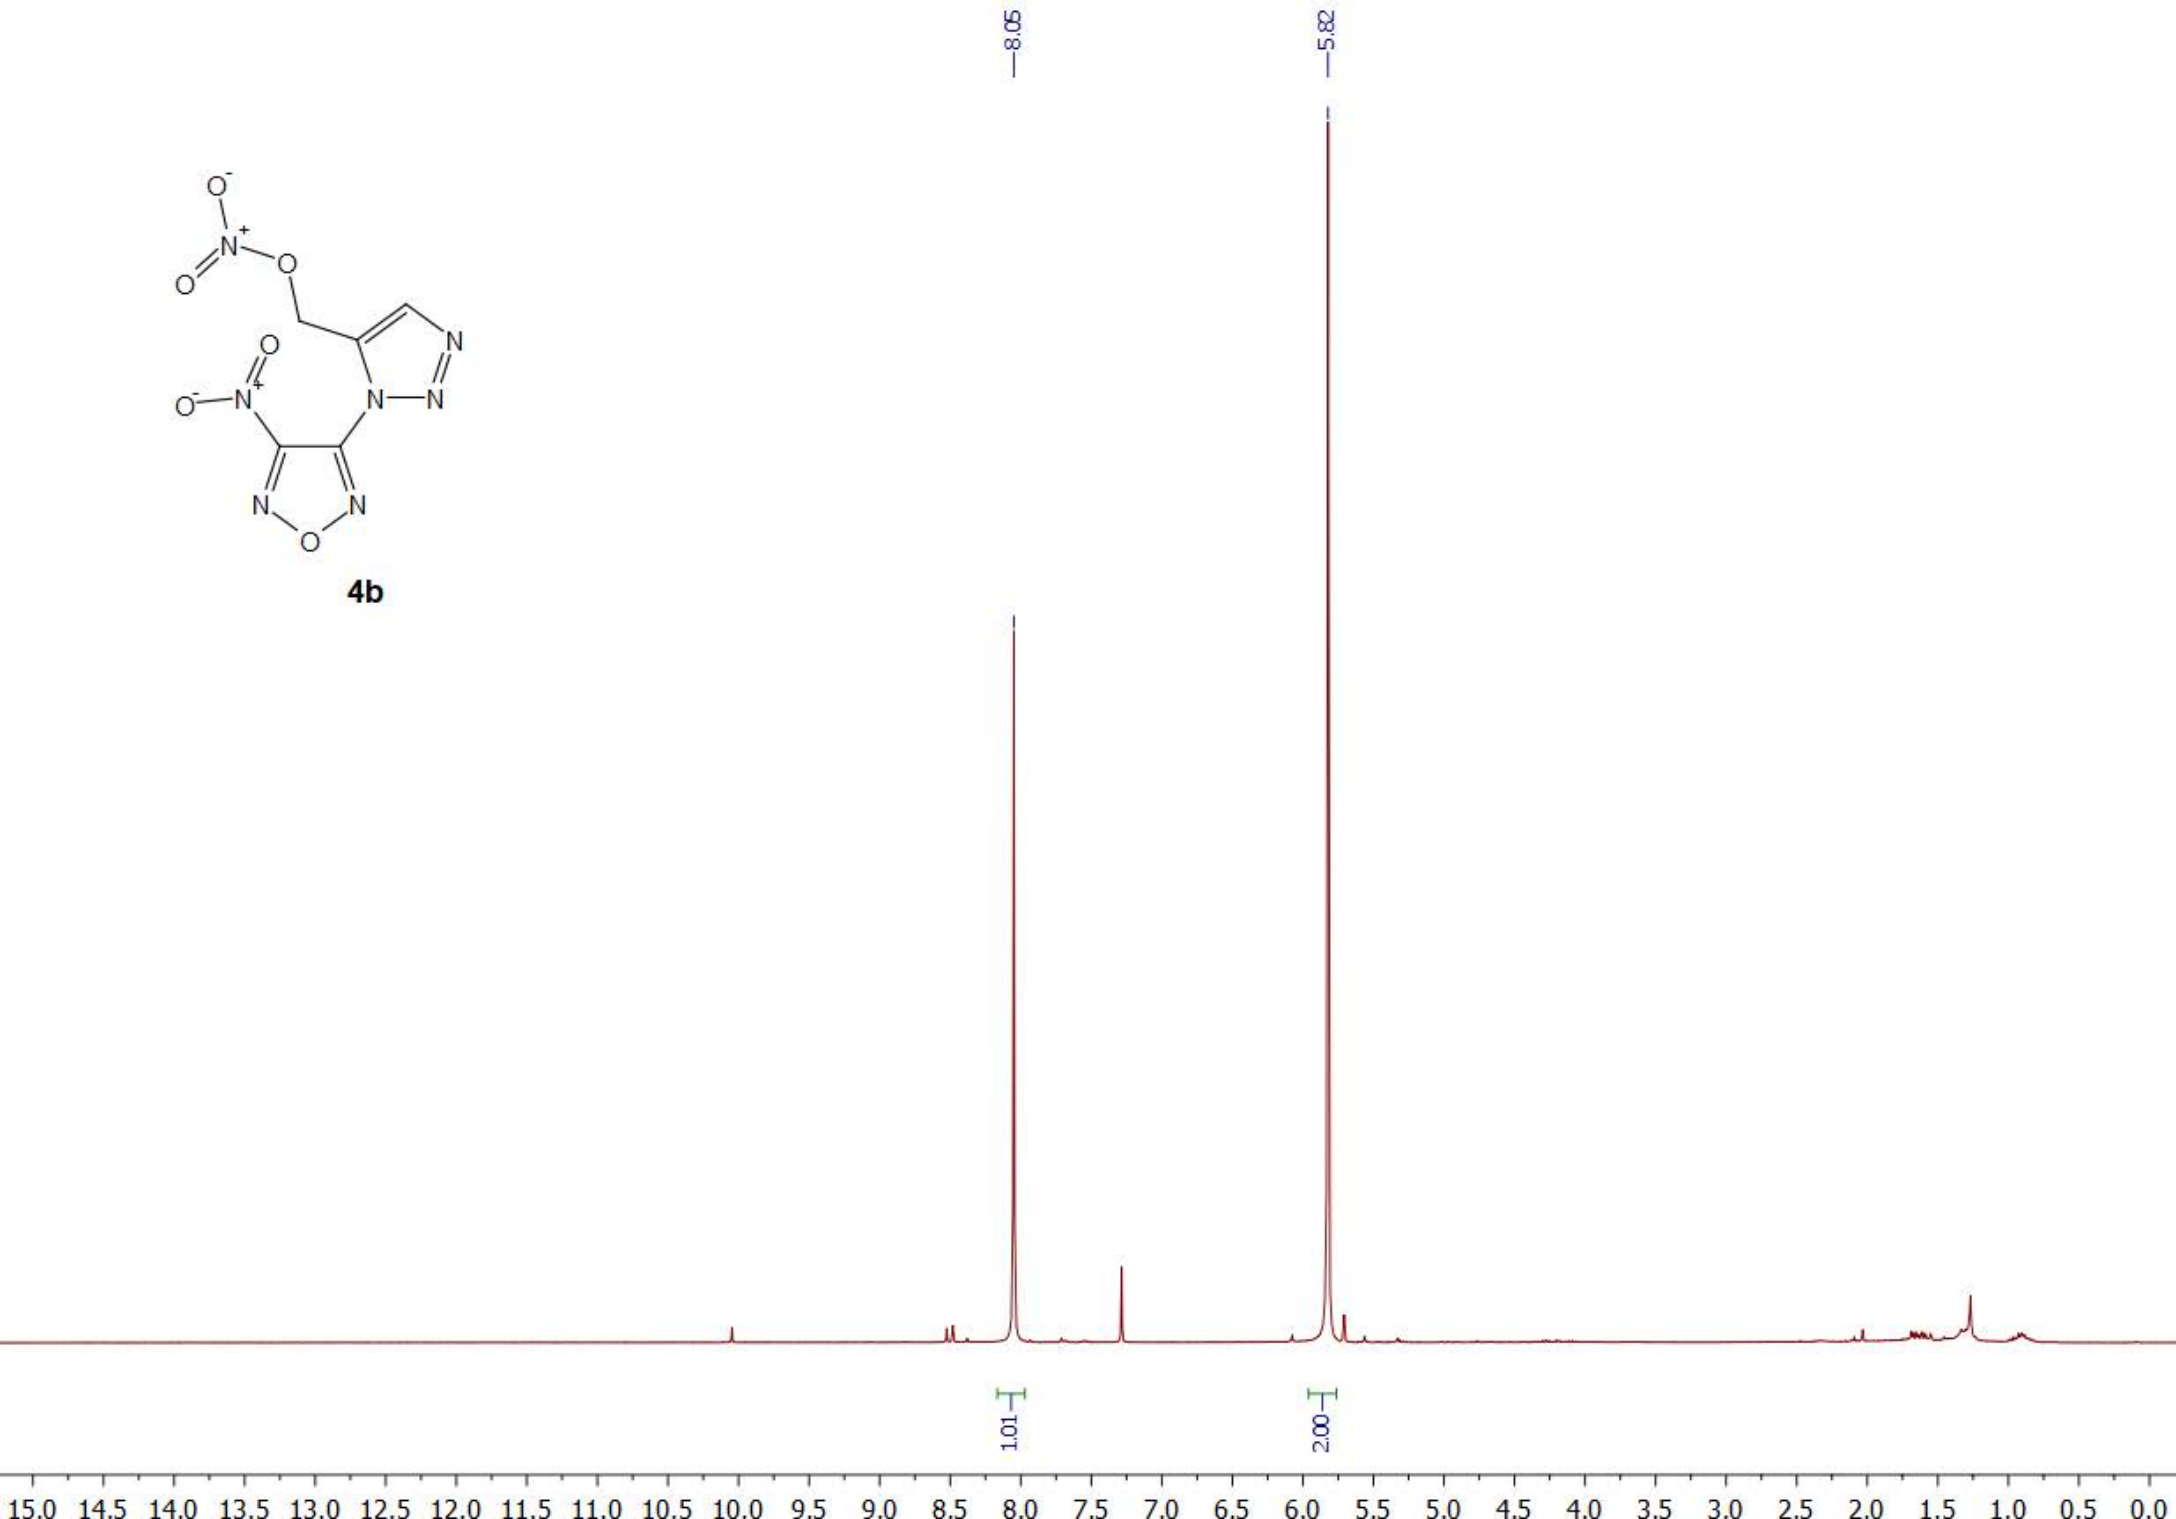



**4b**

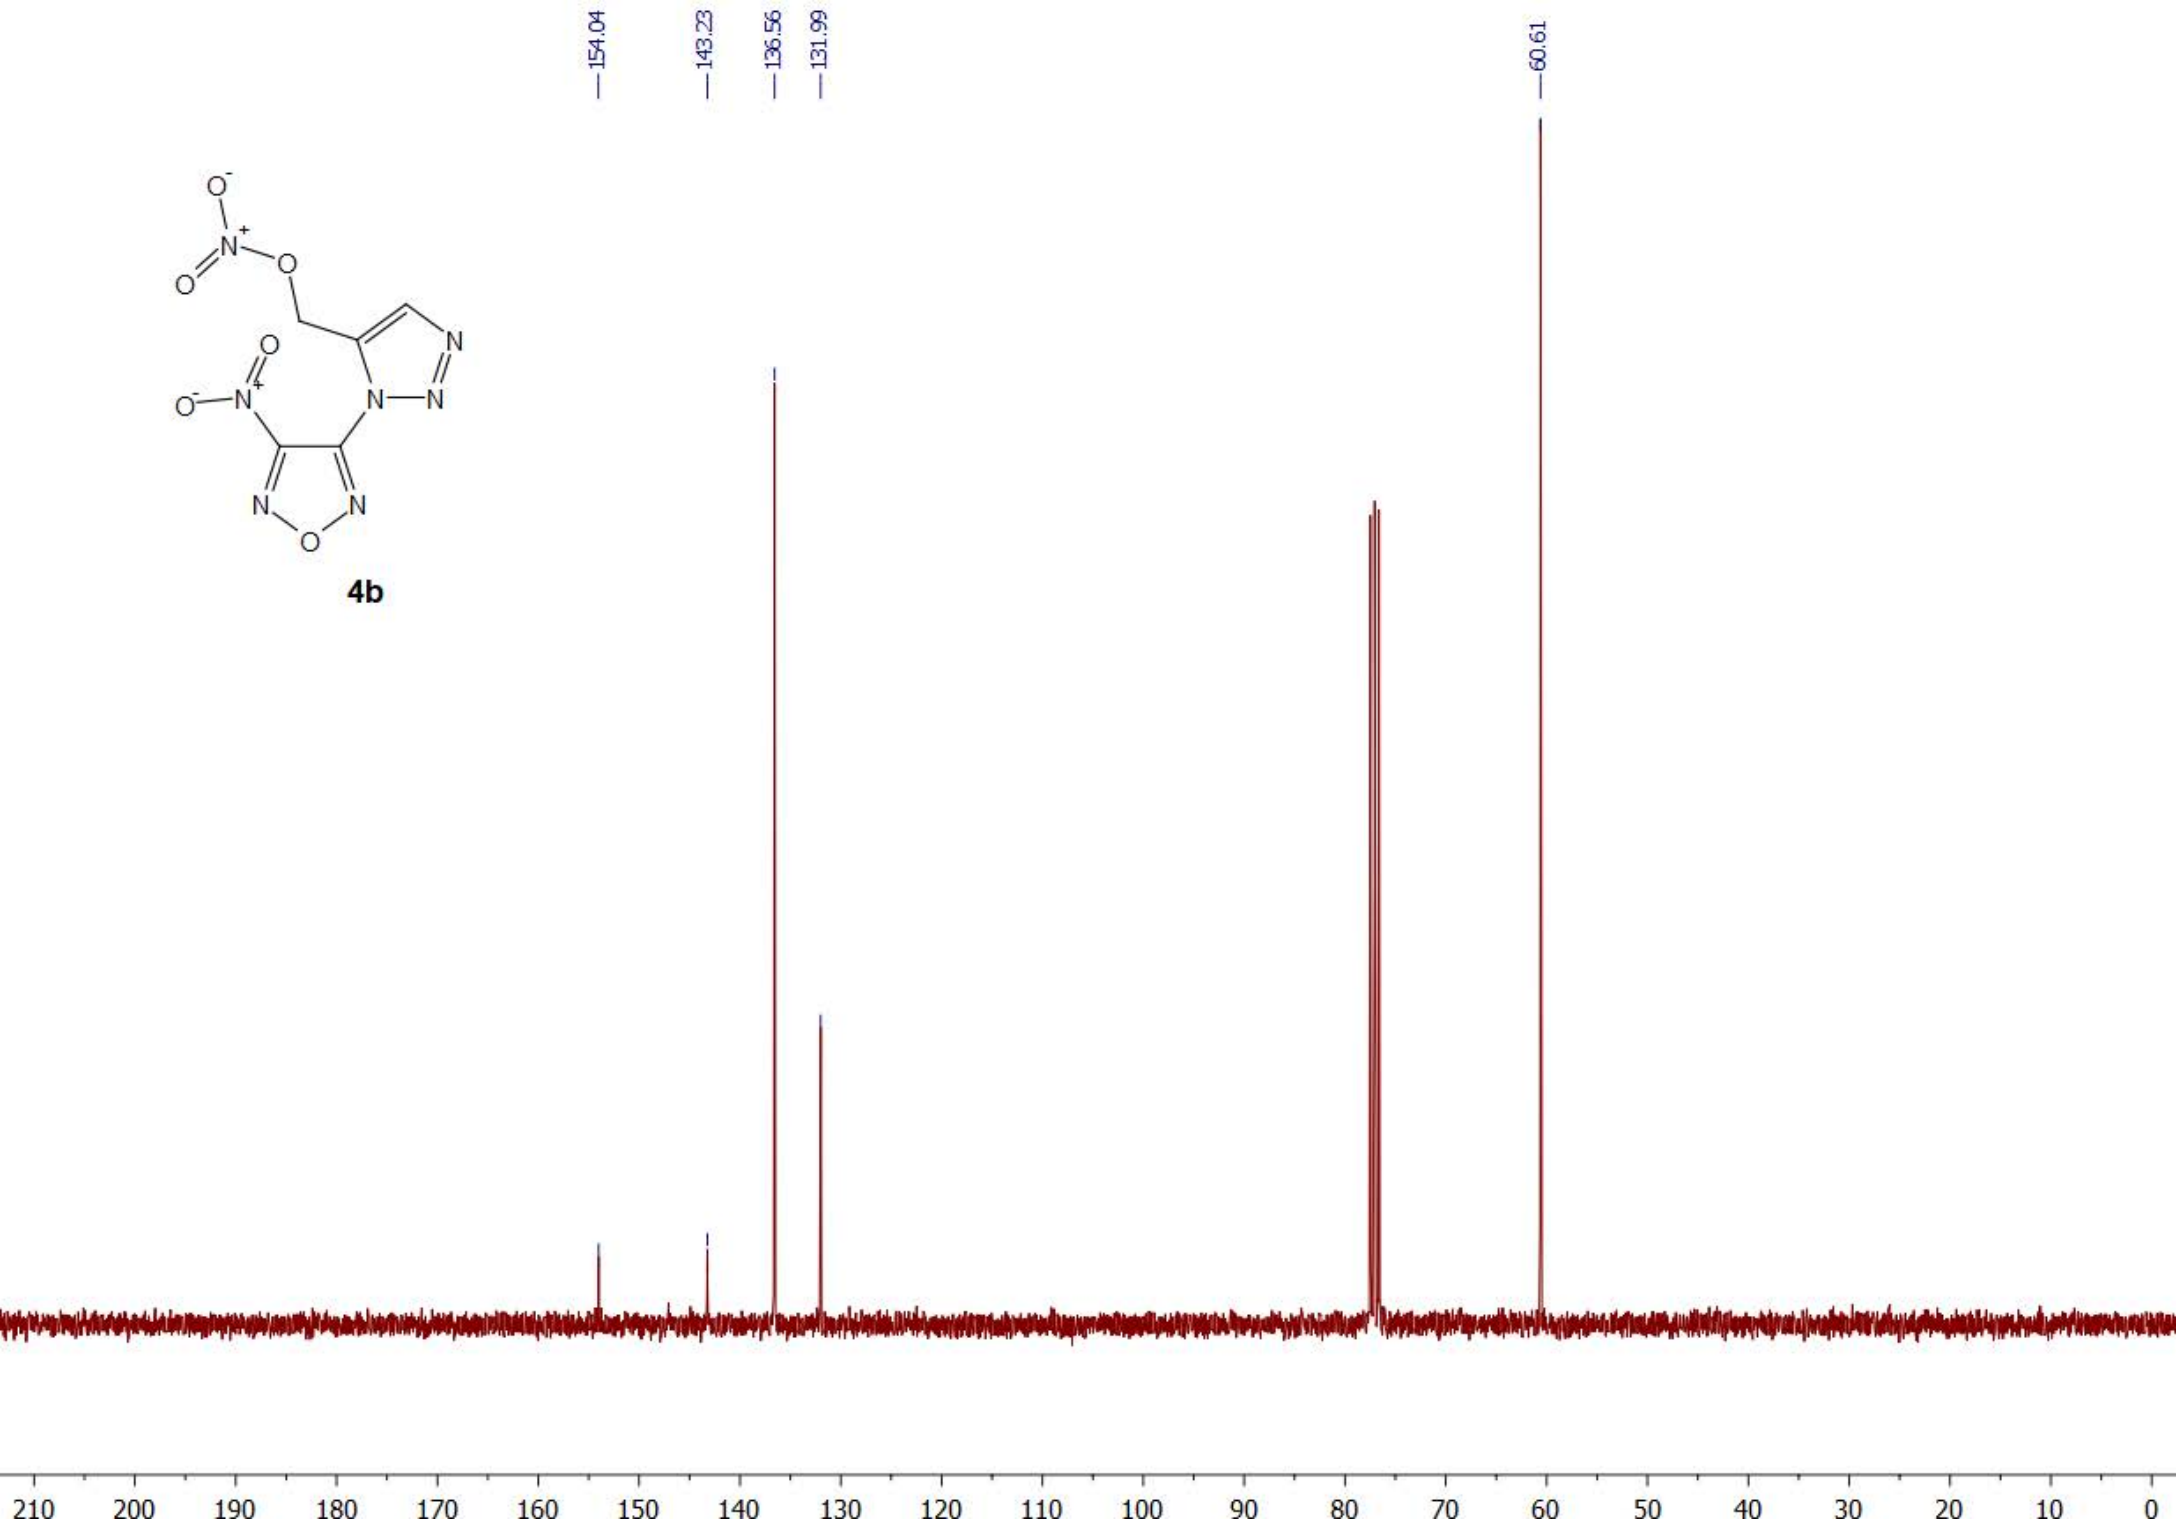

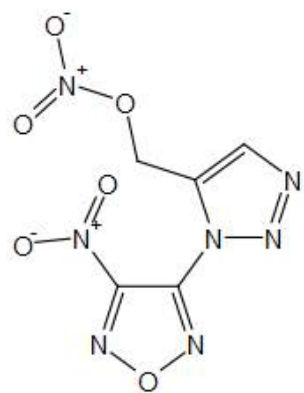

**4b**

— -40.45  
— -50.34

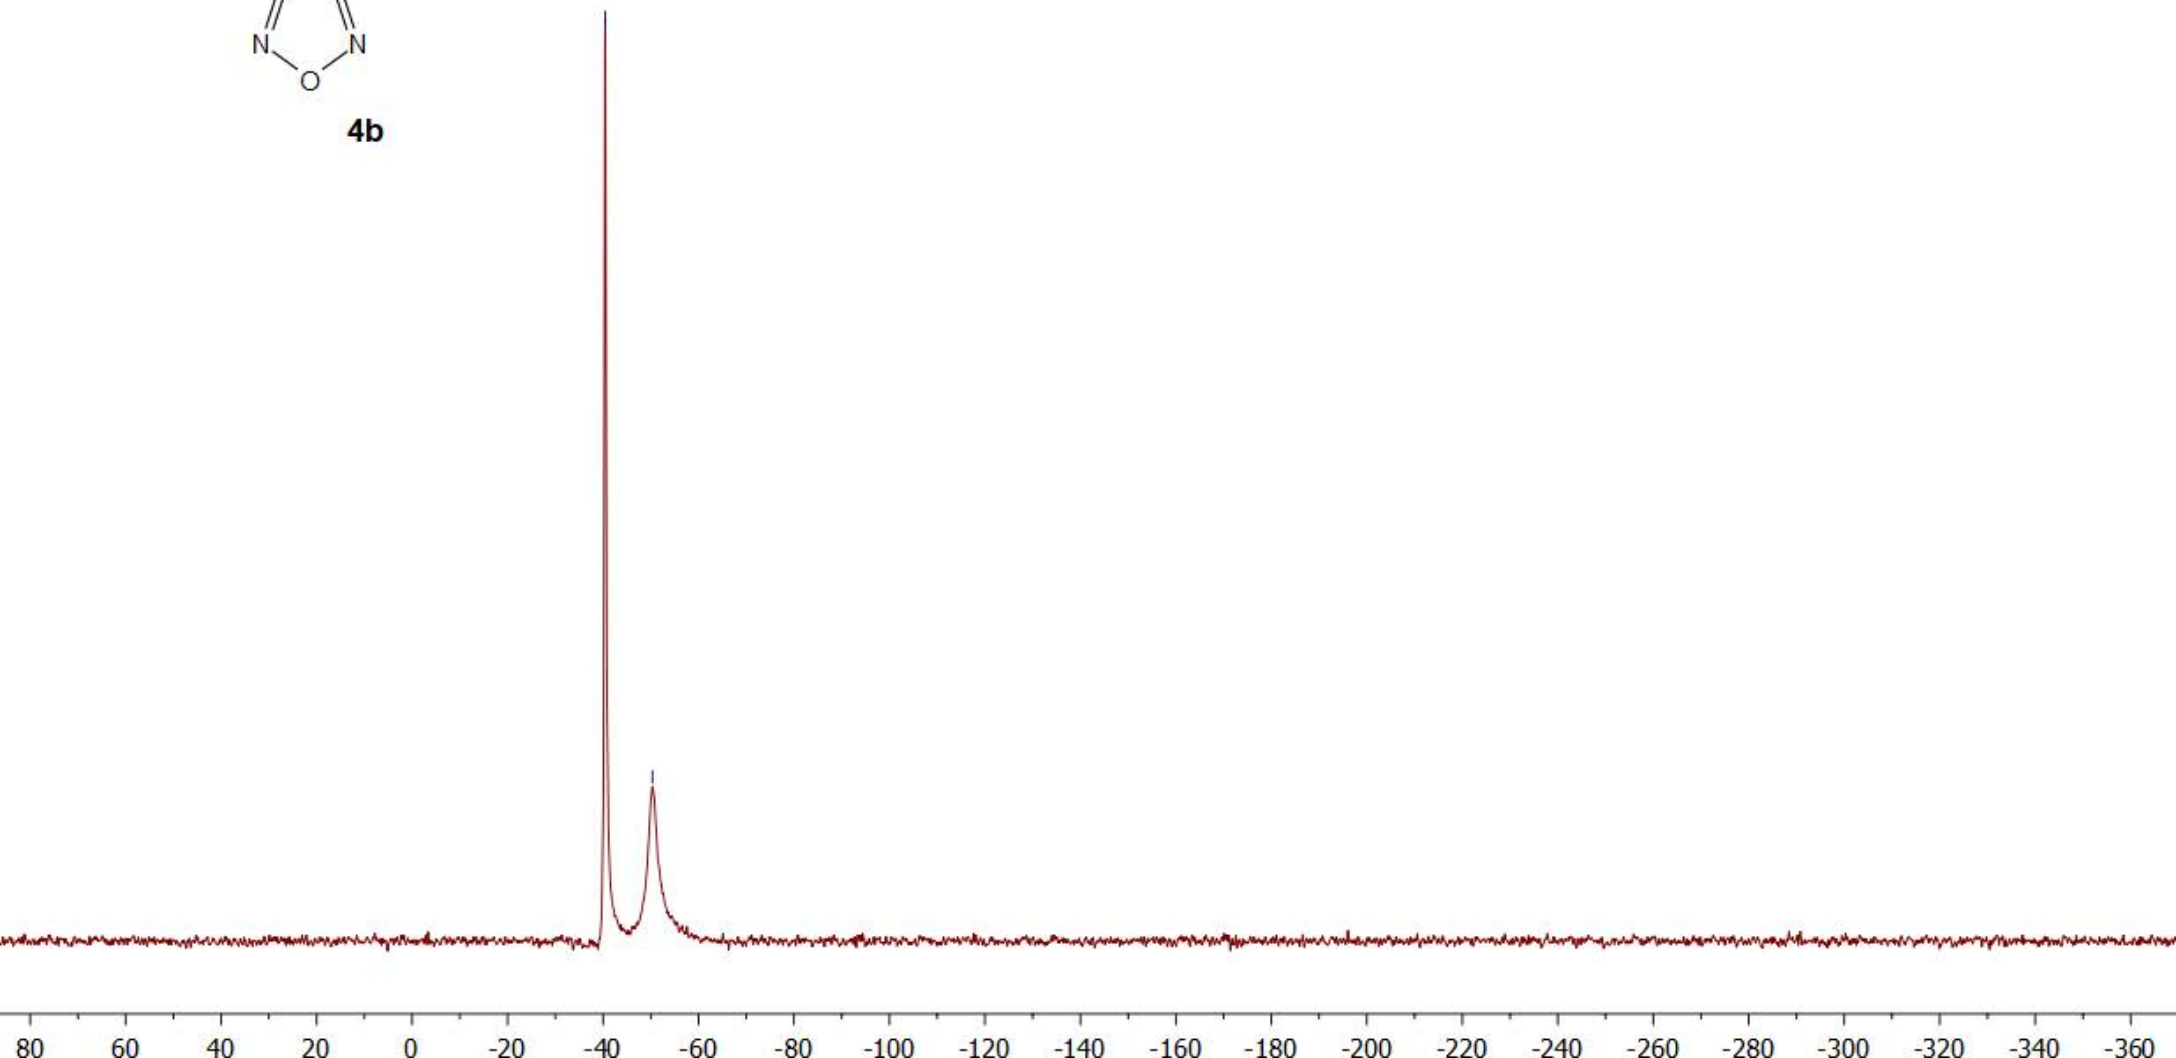

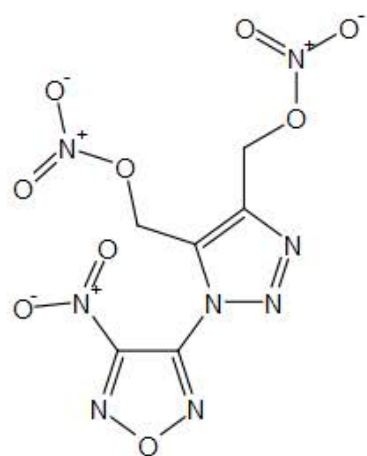

4c

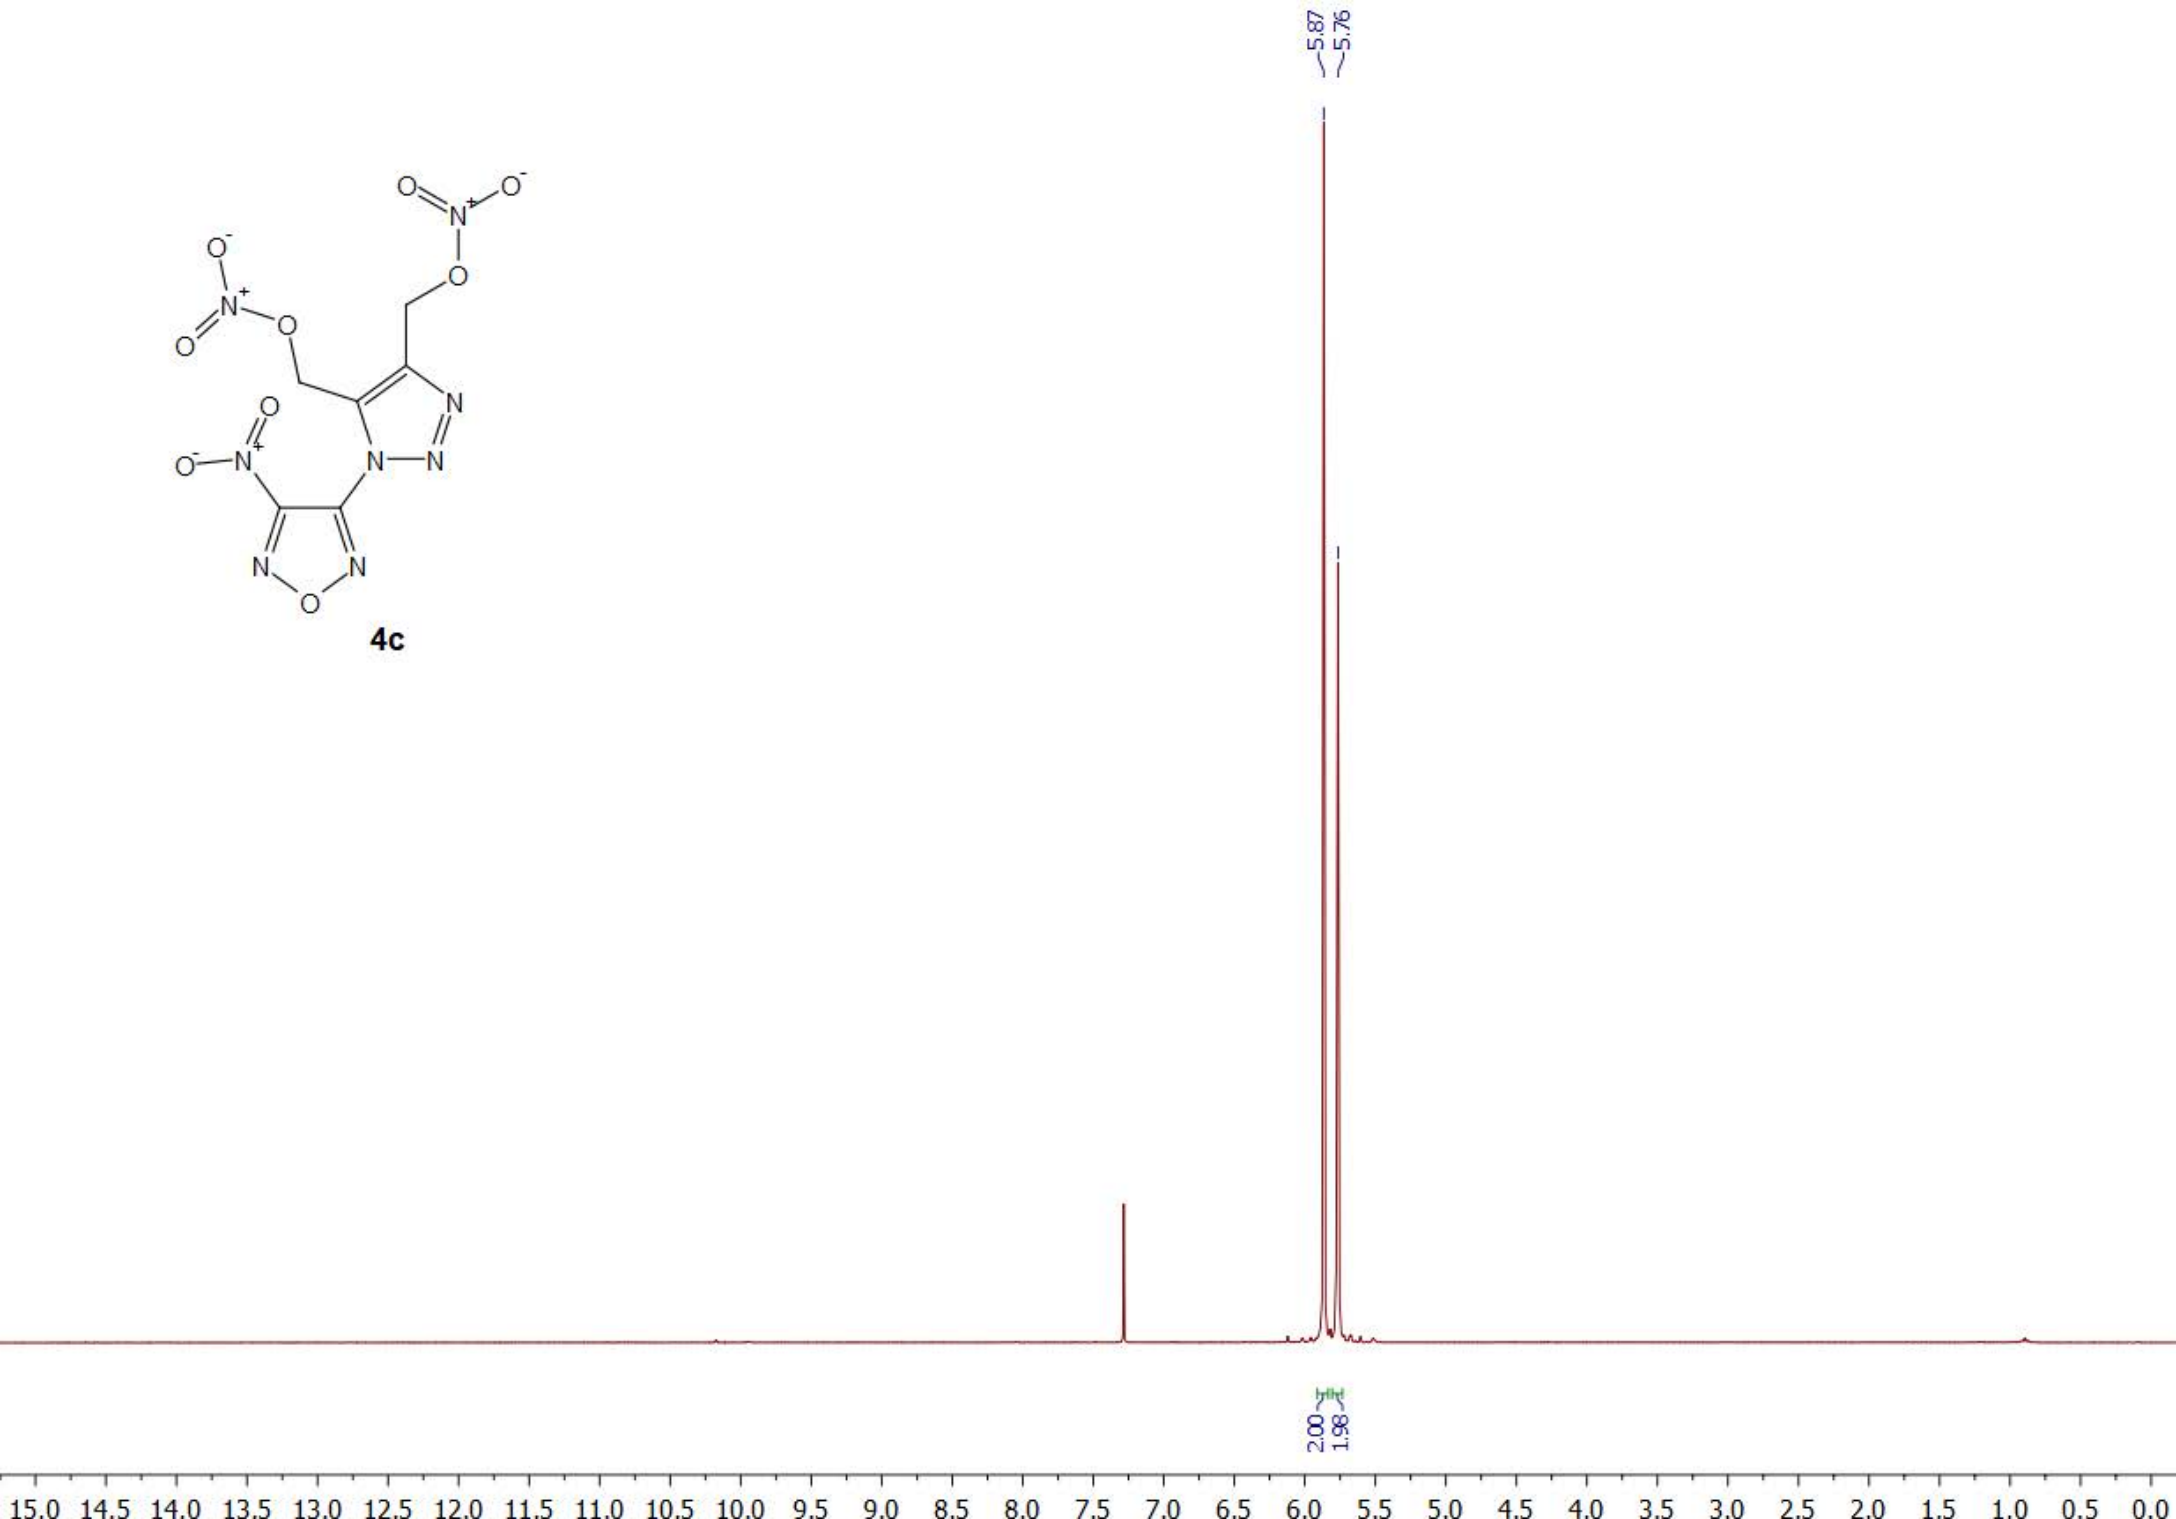



**4c**

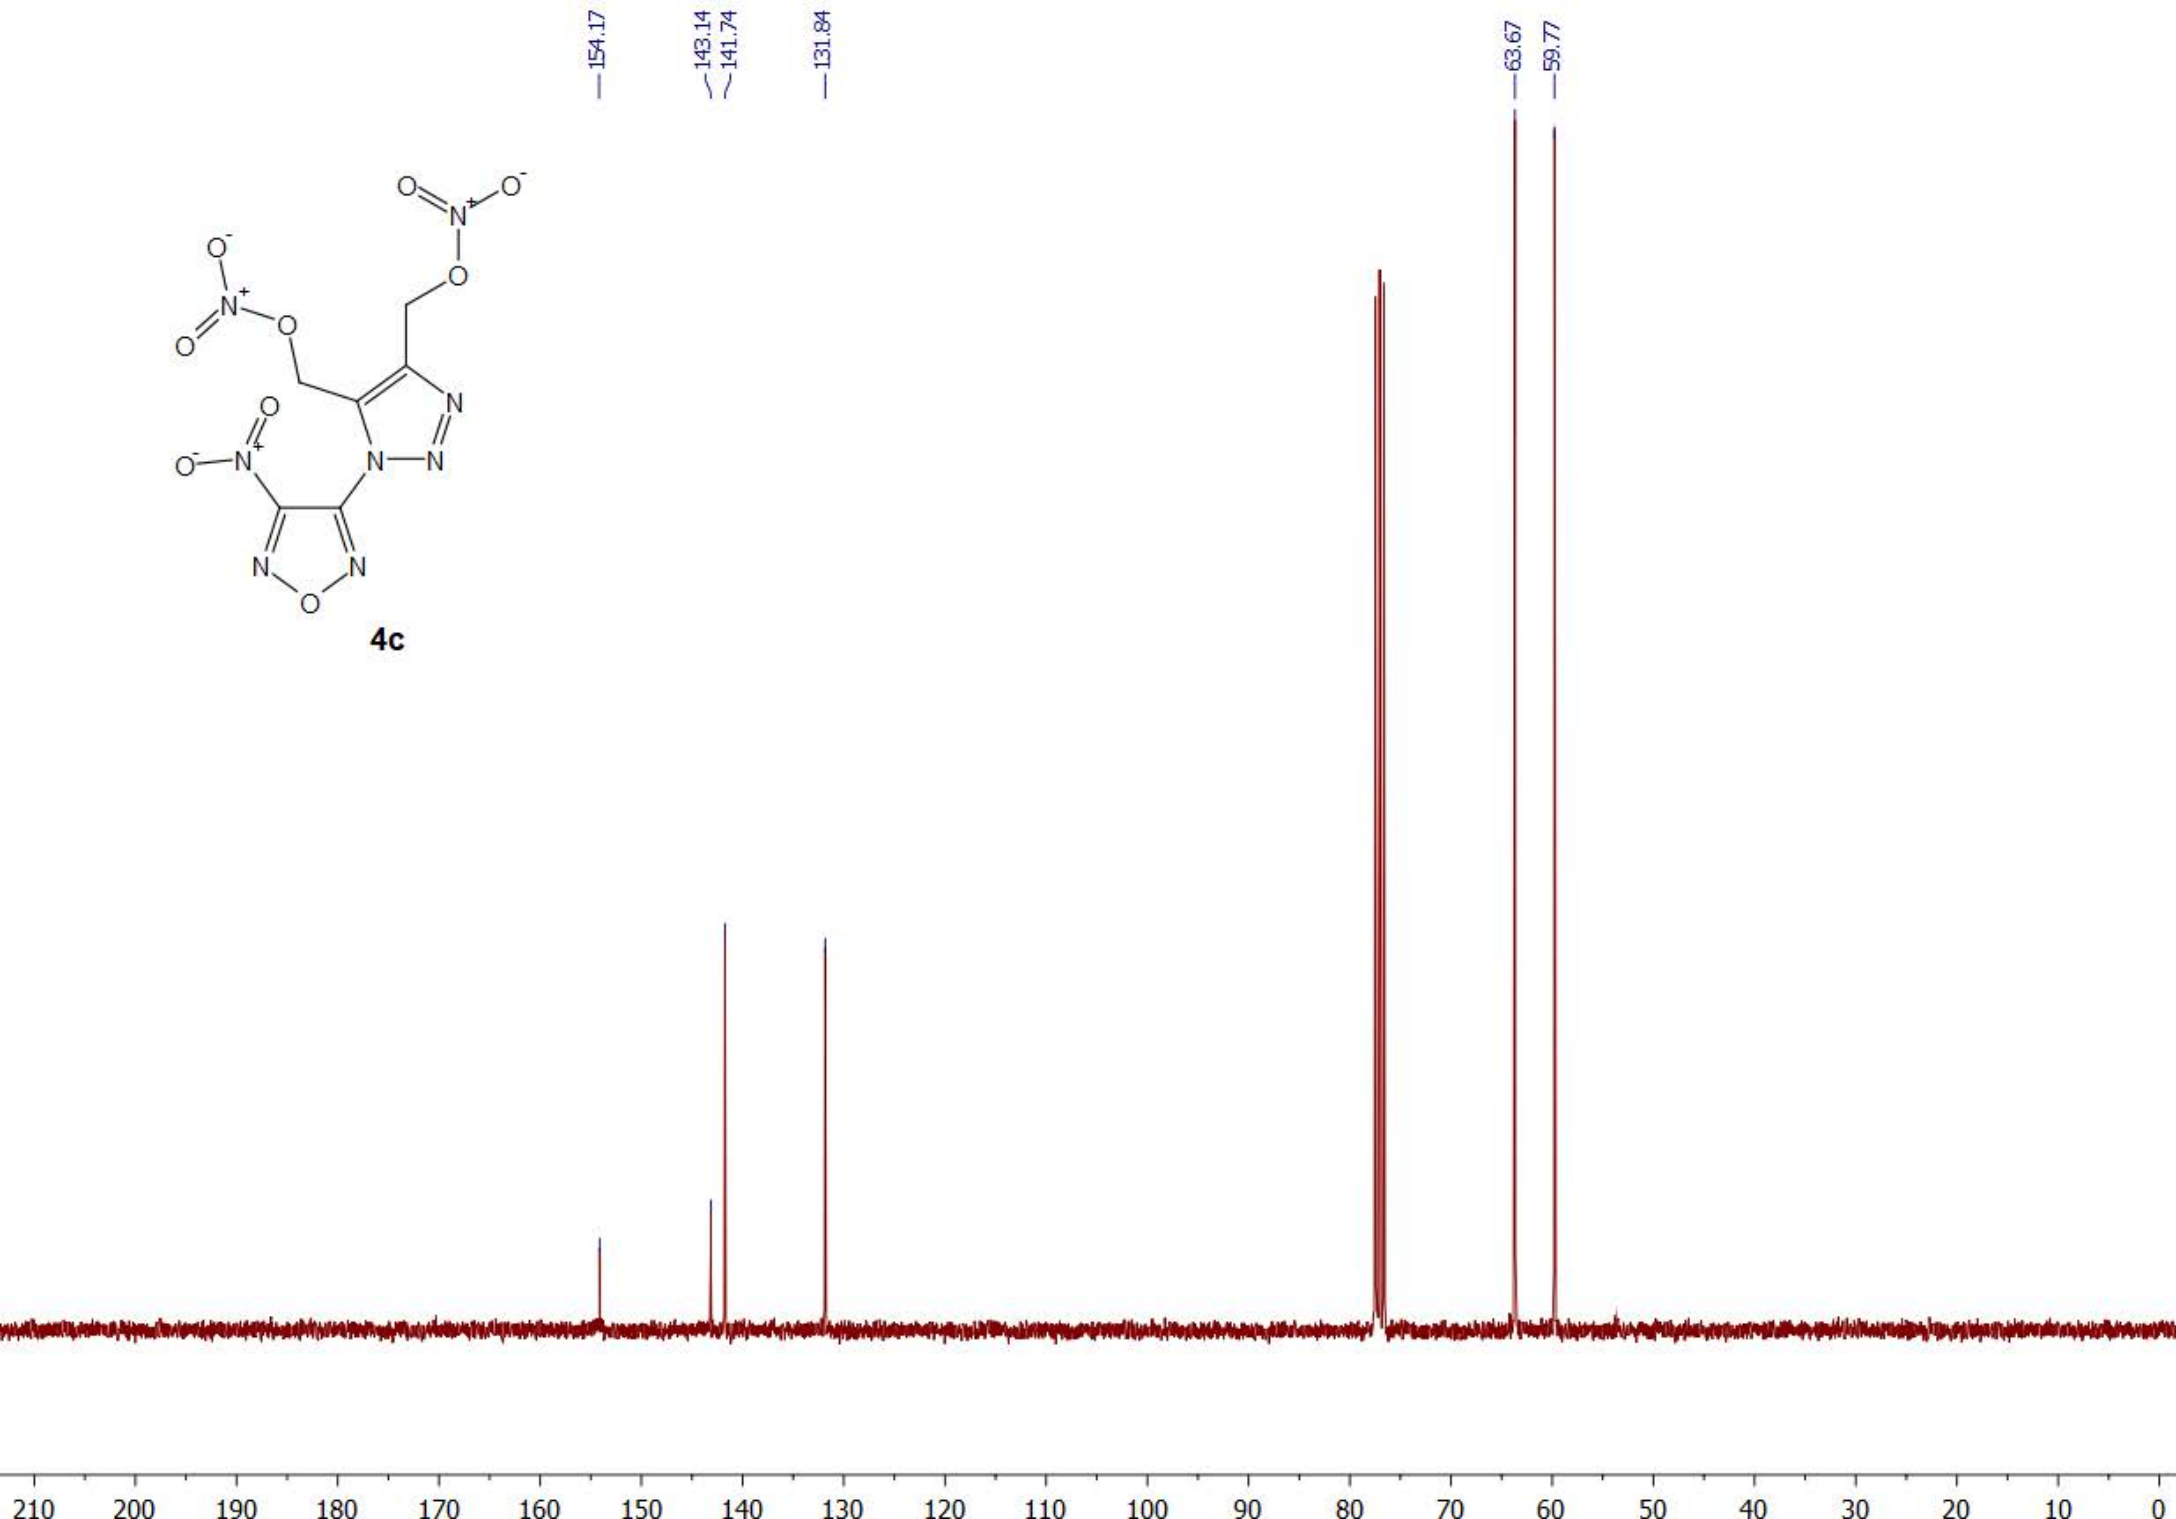



**4c**

41.19  
47.72  
50.75

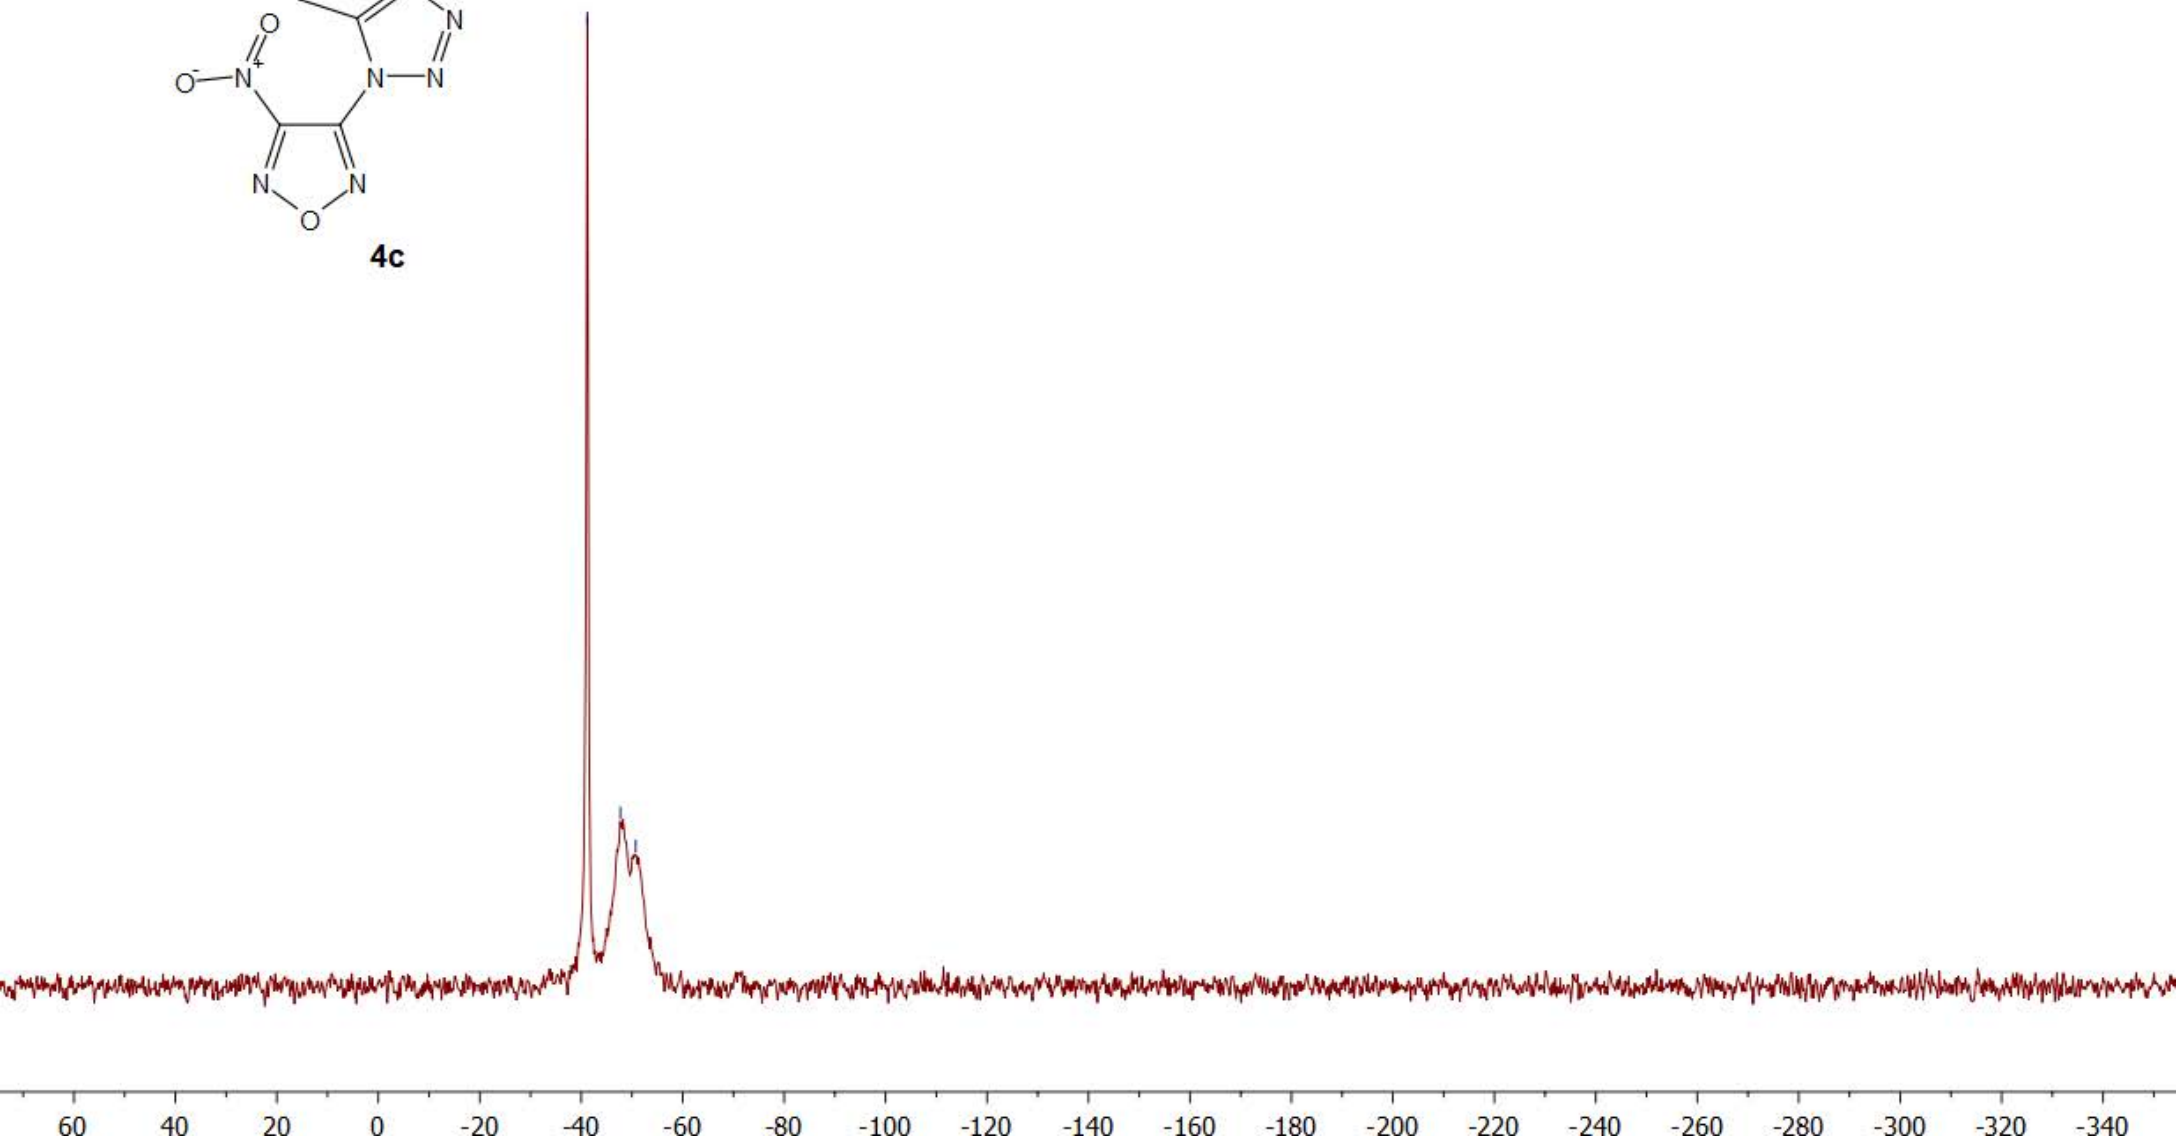

Supplement: d3dt00917c1.pdf [file d3dt00917c1.pdf]
